# Supplementary material for: Complex-disease networks of trait-associated single-nucleotide polymorphisms (SNPs) unveiled by information theory
Source: PubMed Central journal article supplement — J Am Med Inform Assoc. 2012 Jan 25;19(2):295–305. doi: 10.1136/amiajnl-2011-000482 (PMC3277620; doi:10.1136/amiajnl-2011-000482), 2012-01-25
Supplement: supp_amiajnl-2011-000482_Supplementary_materials.pdf [file supp_amiajnl-2011-000482_Supplementary_materials.pdf]

## Supplementary materials: Complex Disease Networks of Trait-Associated SNPs Unveiled by Information Theory

Haiquan Li<sup>1,2+</sup>, Younghee Lee<sup>1,2+</sup>, James L. Chen<sup>1,3</sup>, Ellen Rebman<sup>1§,5</sup>, Jianrong Li<sup>1§,5</sup>, Yves A. Lussier<sup>1,2,4§,5,\*</sup>

<sup>1</sup>Center for Biomedical Informatics,

<sup>2</sup>Section of Genetic Medicine, and <sup>3</sup>Section of Hematology/Oncology of the Department of Medicine; <sup>4</sup>Comprehensive Cancer Center, Ludwig Center for Metastasis Research, Computation Institute, Institute for Translational Medicine, and Institute for Genomics and Systems Biology; University of Chicago, Chicago IL USA

<sup>5</sup>Institute for Health Informatics & Department of Medicine, University of Illinois at Chicago

+ These authors contributed equally to the work

\*Corresponding author, <sup>§</sup>work conducted in part at the University of Chicago

Postal address: AMB N660B, 909 South Wolcott Avenue, Chicago IL 60612

Email: ylussier@uic.edu; Phone: (312)355-0478

**Supplementary Figure 1:** Disease similarity network calculated using GO molecular function similarity of the host genes of trait-associated intragenic SNPs with similarities  $\geq 0.3$  and empirical p-value  $< 0.05$ .

**Supplementary Figure 2:** Disease network constructed by overlaps of the host genes of trait-associated intragenic SNPs.

**Supplementary Figure 3:** Drug and therapeutic compounds annotations of the prioritized cancer biomodule from the similarity and protein interaction network.

**Supplementary Table 1:** Manual Curation of textual terms representing complex traits and diseases in NHGRI GWAS Catalog.

**Supplementary Table 2:** Enrichment of direct and indirect protein-protein interactions in gene-gene pairs with high information similarity on a genome scale and in the subset of host genes for complex traits in NHGRI GWAS Catalog.

**Supplementary Table 3:** Detailed information about 280 trait-trait similarity connections selected as significant ones among traits.

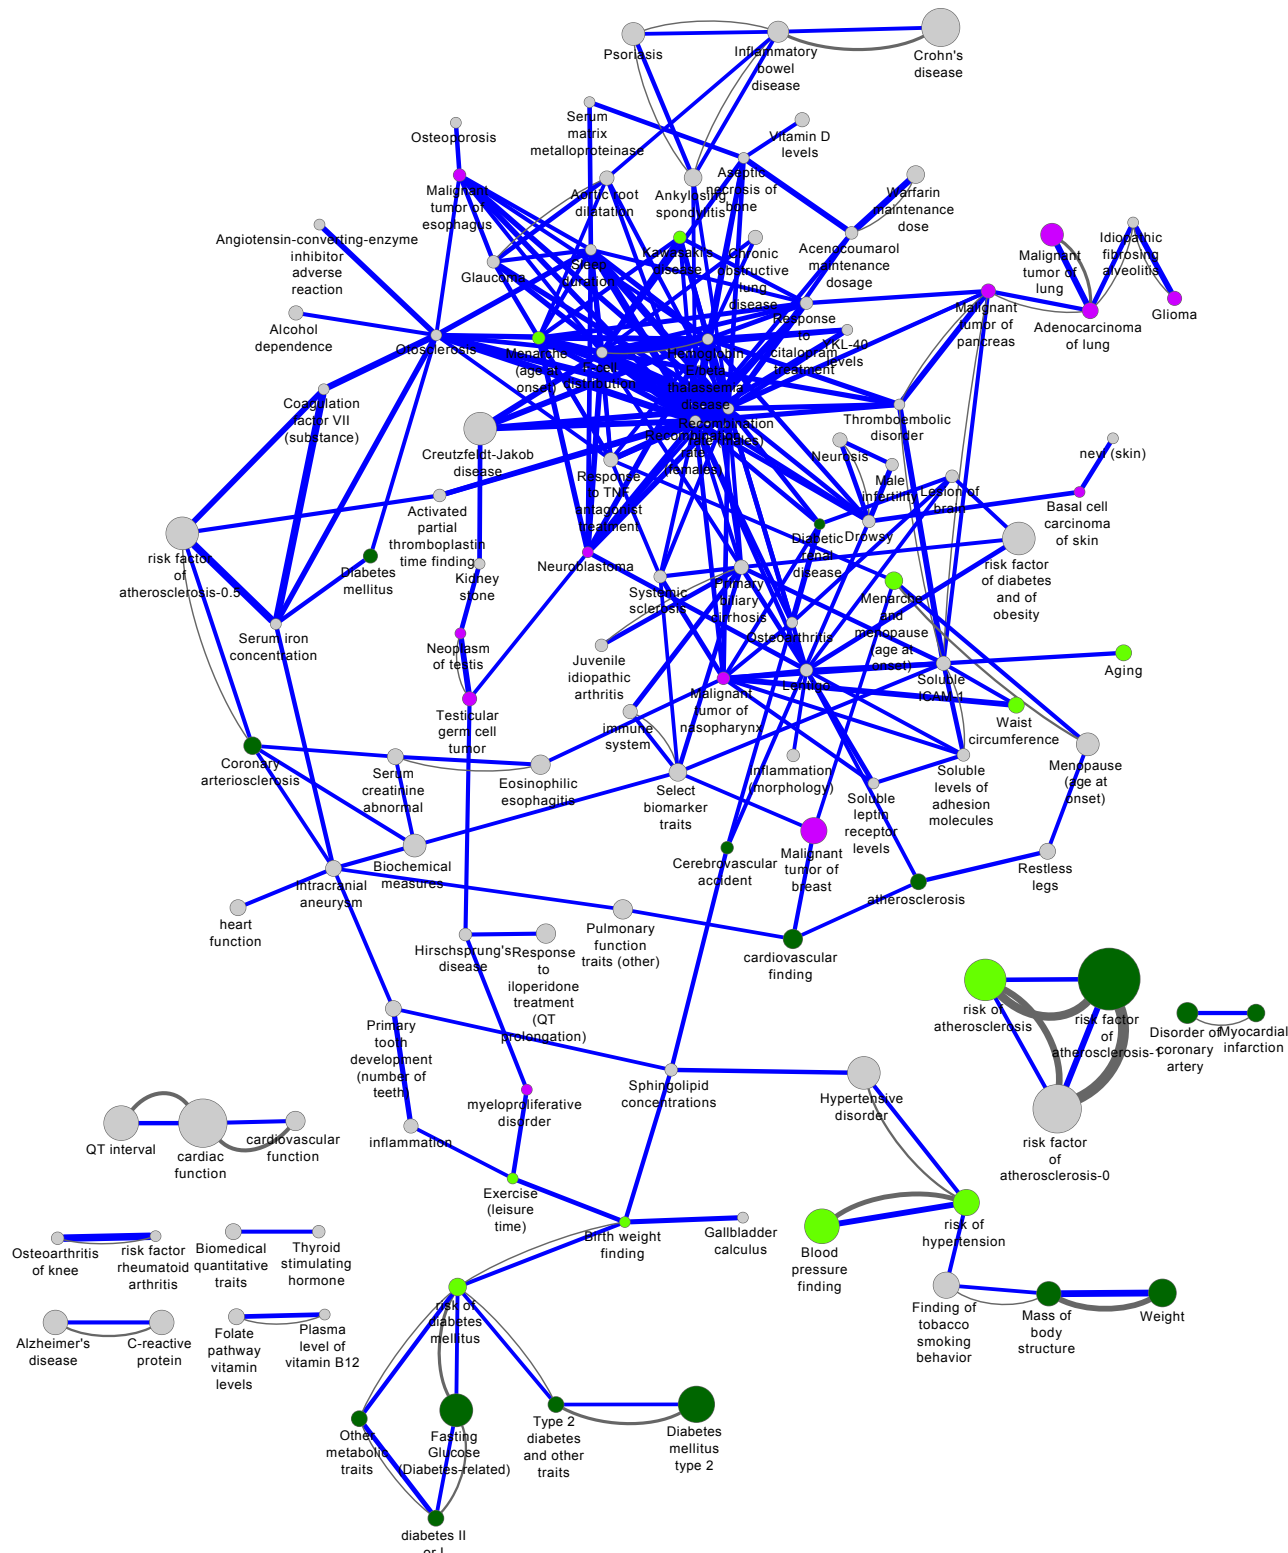

**Legend**

- Circle color**
- Metabolic syndrome traits
  - Risk factors of metabolic syndrome traits
  - Cancer traits
  - Other unclassified traits
- Size proportional to number of SNP host genes per trait**

Trait-trait connections by information theoretical similarity ( ITS)

Trait-trait connections by gene overlaps

Line thickness proportional to number of overlapping SNP host genes or intertrait similarity

**Supplementary Figure 1**

**Supplementary Figure 1: Disease similarity network calculated using GO molecular function similarity of the host genes of trait-associated intragenic SNPs with similarities  $\geq 0.3$  and empirical p-value $<0.05$ .** As shown, among 237 intertrait similarity connections (blue lines), 194 (81.9%) cannot be explained simply by shared host genes between the traits (grey lines) and are reported here for the first time. Therefore, this figure illustrates that our ITS method has found non-trivial relationships that would not have been found by conventional methods. As hypothesized, metabolic syndrome traits (green) were significantly enriched in connections with other traits in the same metatrait (OR=1.85,  $p=0.025$ , Fisher's Exact Test) but cancer traits (purple) were not found to be significantly more likely to interact with other cancer traits (OR=2.25,  $p=0.11$ ; FET test). Circles in the figure represent diseases or traits whose sizes are proportional to their number of associated intragenic SNP host genes. Green circles represent metabolic syndrome related traits curated *a priori* (dark green for metabolic syndrome traits and light green for their risk factors), purple circles represent cancer traits and grey circles represent uncategorized traits. Blue lines represent biological process similarities  $\geq 0.3$  and  $p\text{-value}<0.05$ . Grey lines represent shared SNP host genes between diseases if their Trait\_ITS is  $\geq 0.3$  and  $p\text{-value}<0.05$  (in other words overlapping connections between our information theoretic method and conventional gene overlapping method). Line thicknesses are proportional to Trait\_ITS similarity values or number of shared genes.

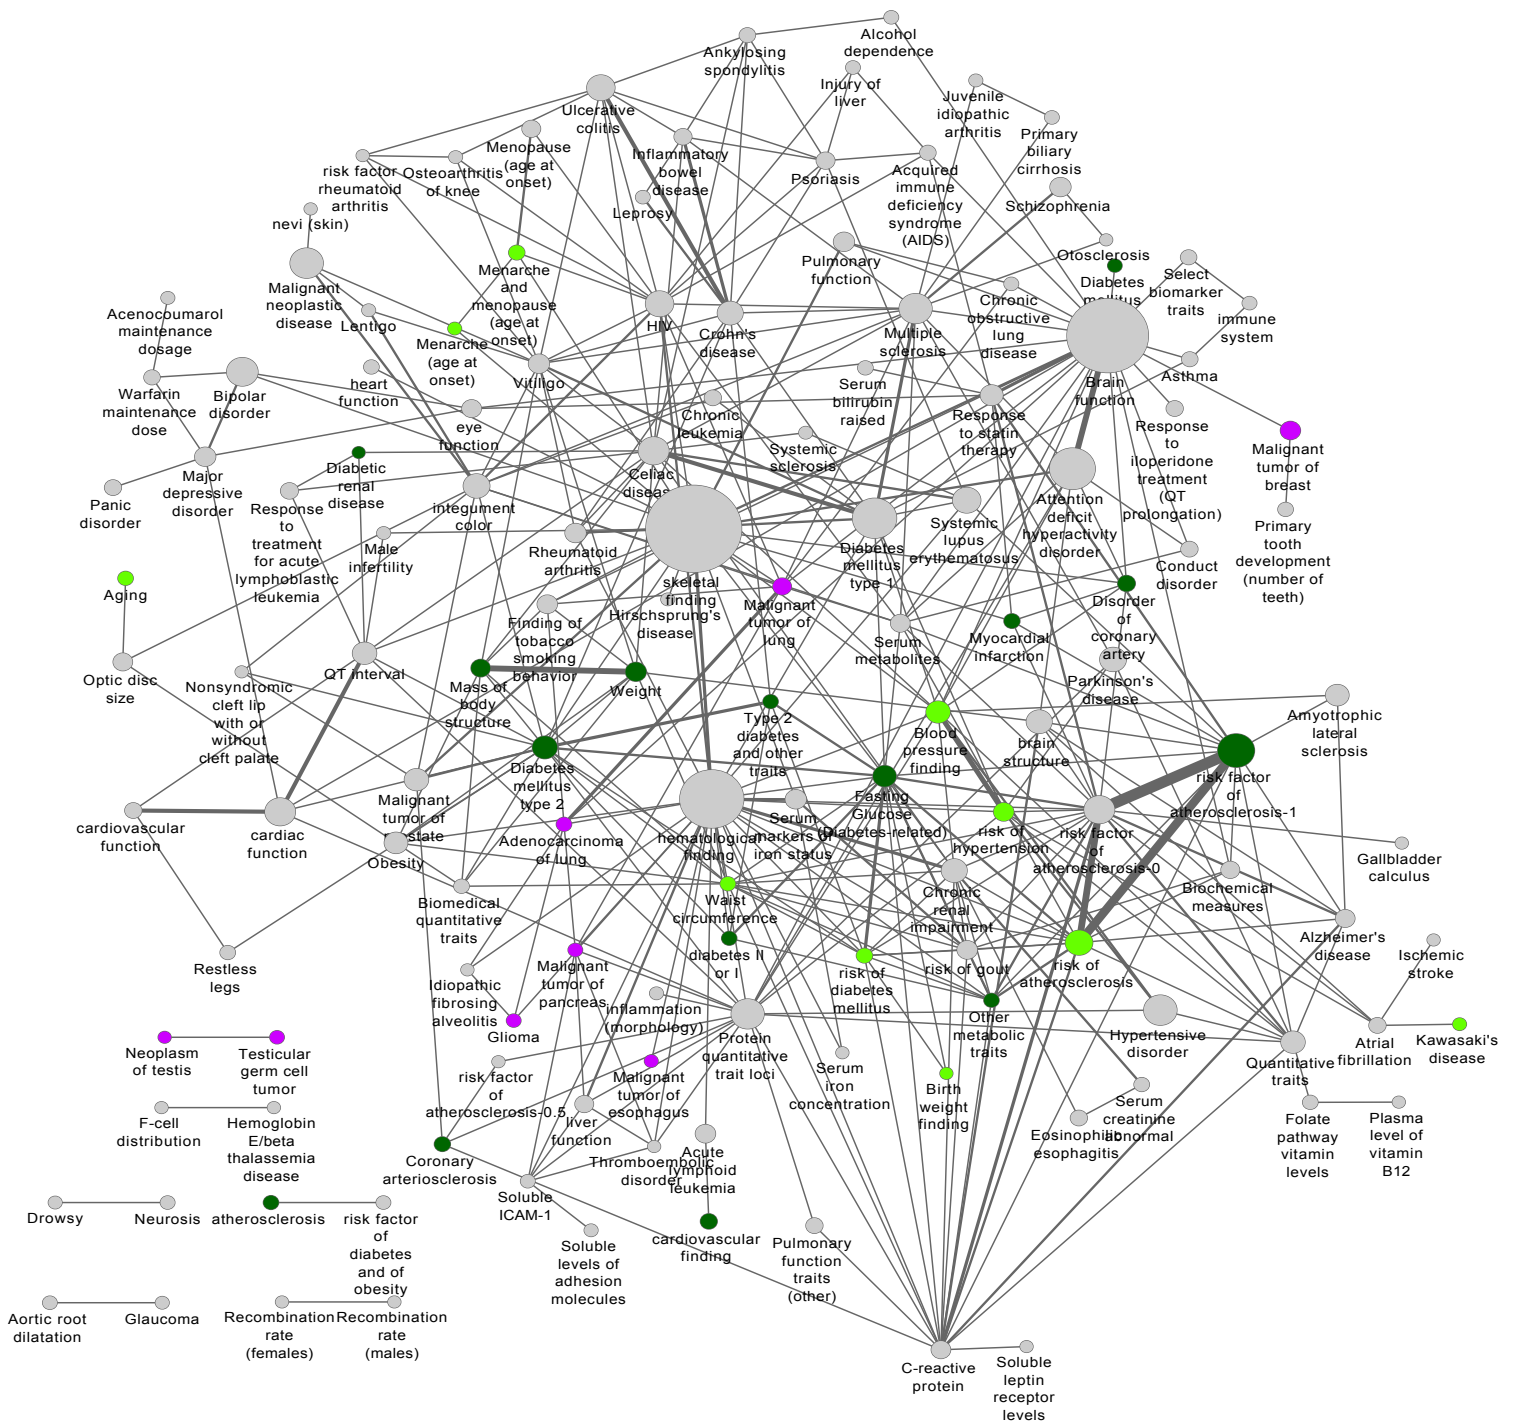

**Legend**

- |   |   |                                           |   |                                                                     |
|---|---|-------------------------------------------|---|---------------------------------------------------------------------|
| { | ● | Metabolic syndrome traits                 | — | Trait-trait connections by gene overlaps                            |
|   | ● | Risk factors of metabolic syndrome traits | = | Line thickness proportional to number of overlapping SNP host genes |
|   | ● | Cancer traits                             | ● | Size proportional to number of SNP host genes per trait             |
|   | ● | Other unclassified traits                 |   |                                                                     |

**Supplementary Figure 2**

**Supplementary Figure 2: Disease network constructed by overlaps of the host genes of trait-associated intragenic SNPs.** This figure is intended to discriminate between biological similarity that can be explained by simple genetic overlap of host genes between two traits and non-trivial similarity that cannot be explained by gene overlap. As shown, among 383 intertrait similarity connections (grey lines). As hypothesized, metabolic syndrome traits (green) were significantly enriched in connections with other traits in the same metatrait (OR=4.1,  $p=5.2 \times 10^{-15}$ , Fisher's Exact Test) but cancer traits (purple) were not found to be significantly more likely to interact with other cancer traits (OR=1.7,  $p=0.22$ ; FET test). In other word, the biological similarity (mechanism scale) unveiled by Trait\_ITS is non-trivial because it cannot be explained at the gene overlap level (genetic scale). Circles in the figure represent diseases or traits whose sizes are proportional to their number of associated intragenic SNP host genes. Green circles represent metabolic syndrome related traits curated *a priori* (dark green for metabolic syndrome traits and light green for their risk factors), purple circles represent cancer traits and grey circles represent uncategorized traits. Grey lines represent shared SNP host genes between diseases. Line thicknesses are proportional to number of shared genes.

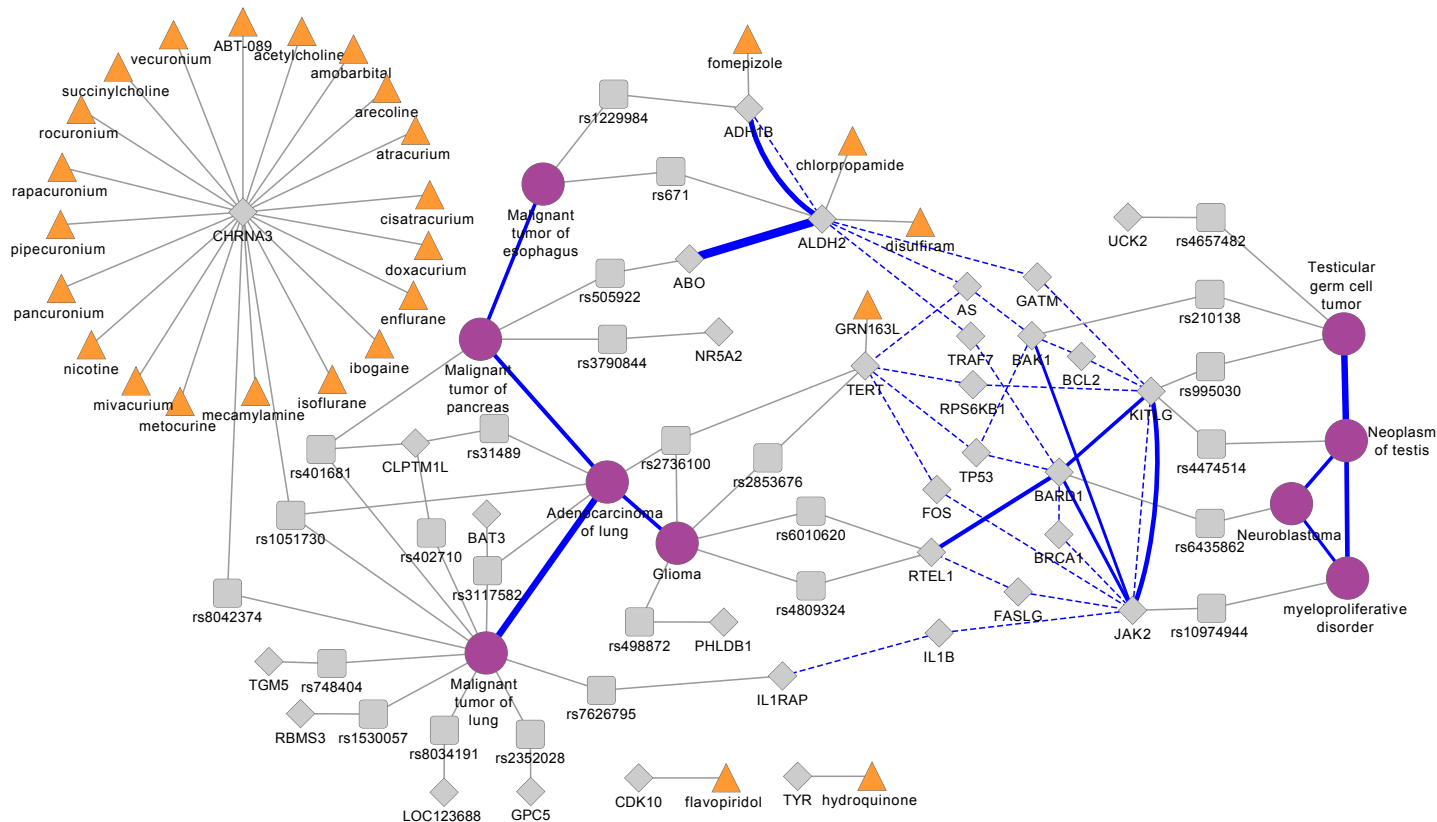

Supplementary Figure 3: Drug and therapeutic compounds annotations of the prioritized cancer biomodule from the similarity and protein interaction network. Legend: grey diamonds are host genes of intragenic SNPs or genes linking these host genes; orange triangles are drugs targeted to connected host genes. Grey lines represent mappings from SNPs to their host genes, associations between SNPs and their complex traits, and targeting between drugs and host genes. Connections of GO:BP intertrait similarity and host gene-gene similarity are colored in blue ( $ITS \geq 0.2$ ). Shortest paths of protein interactions are represented by dashed lines.

**Supplementary Table 1. Manual Curation of textual terms representing complex traits and diseases in NHGRI GWAS Catalog.**

| <b>Metatrait</b>         | <b>Complex Trait and Diseases (Curated Concept Used for Similarity Metric)</b> | <b>Complex Trait and Diseases (Original NHGRI Term)</b>                    | <b>Host Gene (dbSNP)</b>                                                                               |
|--------------------------|--------------------------------------------------------------------------------|----------------------------------------------------------------------------|--------------------------------------------------------------------------------------------------------|
|                          | Acenocoumarol maintenance dosage                                               | Acenocoumarol maintenance dosage                                           | CYP2C19, CYP4F2                                                                                        |
|                          | Acquired immune deficiency syndrome (AIDS)                                     | AIDS<br>AIDS progression                                                   | TGFBRAP1, RXRG, SOX5<br>HCP5, ZNRD1                                                                    |
|                          | Activated partial thromboplastin time finding                                  | Activated partial thromboplastin time                                      | KNG1, HRG                                                                                              |
|                          | Acute lymphoid leukemia                                                        | Acute lymphoblastic leukemia (childhood)                                   | ARID5B, ST6GALNAC3, IKZF1, KCNE4, KRTHB5, ZNF230, CEBPE, PARD3, RYR2, KCNMB2                           |
| cancer                   | Adenocarcinoma of lung                                                         | Lung adenocarcinoma                                                        | CHRNA3, TERT, BAT3, CLPTM1L                                                                            |
|                          | Age-related macular degeneration                                               | Age-related macular degeneration<br>Age-related macular degeneration (wet) | ARMS2, CFH, RREB1, COL8A1, C3, PLA2G12A, PTGES3, HTRA1, SKIV2L, CFB, C2, SYN3<br>HTRA1                 |
| risk factor of metabolic | Aging                                                                          | Aging<br>Aging traits                                                      | LRP1B<br>GNG4, KCNAB1, GALNT13                                                                         |
|                          | Alcohol dependence                                                             | Alcohol dependence                                                         | ERAP1, PPP2R2B, ESR1                                                                                   |
|                          | Alzheimer's disease                                                            | Alzheimer's disease<br>Alzheimer's disease (late onset)                    | CLU, DISC1, TOMM40, PCDH11X, CD33, APOC1, CR1, PVRL2<br>GAB2, APOC1                                    |
|                          | Amyotrophic lateral sclerosis                                                  | Amyotrophic lateral sclerosis                                              | DPP6, FHDC1, UNC13A, KIFAP3, DISC1, ITPR2, CNTN4, SUSD1, LIPC, ZFP64, ATXN1, C9orf72, SLC39A11, NT5C1A |
|                          | Angiotensin-converting-enzyme inhibitor adverse reaction                       | Angiotensin-converting enzyme activity                                     | ACE                                                                                                    |
|                          | Ankylosing spondylitis                                                         | Ankylosing spondylitis                                                     | LOC729026, IL23R, LOC100128641, ERAP1, ANTXR2                                                          |
|                          | Aortic root dilatation                                                         | Aortic root size                                                           | LOC644976, SMG6, LOXL1                                                                                 |
|                          | Aseptic necrosis of bone                                                       | Osteonecrosis of the jaw                                                   | CYP2C8                                                                                                 |
|                          | Asthma                                                                         | Asthma<br>Asthma (toluene diisocyanate-induced)                            | RAD50, CRB1, VISA, GSDML<br>CTNNA3                                                                     |
| metabolic syndrome       | atherosclerosis                                                                | Carotid atherosclerosis in HIV infection                                   | MAST4, LOC100133411, GRM8, RYR3                                                                        |
|                          | Atopy                                                                          | Atopy                                                                      | LOC91461                                                                                               |
|                          | Atrial fibrillation                                                            | Atrial fibrillation/atrial flutter<br>Atrial fibrillation                  | LOC729065<br>CNTN5, KCNN3, LOC729065, MTHFR, ZFH3, LOC220416                                           |

**Supplementary Table 1. Manual Curation of textual terms representing complex traits and diseases in NHGRI GWAS Catalog.**

| Metatrait                         | Complex Trait and Diseases (Curated Concept Used for Similarity Metric) | Complex Trait and Diseases (Original NHGRI Term)                | Host Gene (dbSNP)                                                                                                                                                                                                                                                                                                                   |
|-----------------------------------|-------------------------------------------------------------------------|-----------------------------------------------------------------|-------------------------------------------------------------------------------------------------------------------------------------------------------------------------------------------------------------------------------------------------------------------------------------------------------------------------------------|
|                                   | Attention deficit hyperactivity disorder                                | Attention deficit hyperactivity disorder                        | ATP2C2, LOC100130457, TLL2, ASTN2, C9orf98, CDH13, MMP24, UNC5B, FOXP1, MAP1B, ITGAE, CREB5, MYT1L, CRYGC, CSMD2, NAPRT1, DNMT1, MGC33657, ZNF544, MAN2A2, SUPT3H, PPM1F, REEP5, NT5DC3, C10orf79, FHIT, ITGA11, NAP5, GPC6, MOBP, MTA3                                                                                             |
|                                   |                                                                         | Attention deficit hyperactivity disorder (time to onset)        | ADAMTS2, SULF2                                                                                                                                                                                                                                                                                                                      |
|                                   |                                                                         | Attention deficit hyperactivity disorder and conduct disorder   | RGL1, A2BP1, KIRREL3, PKD1L3, PKD1L2, PAWR, C12orf28                                                                                                                                                                                                                                                                                |
|                                   |                                                                         | Attention deficit hyperactivity disorder symptoms (interaction) | PIWIL4, KIF6                                                                                                                                                                                                                                                                                                                        |
| cancer                            | Basal cell carcinoma of skin                                            | Basal cell carcinoma (cutaneous)                                | PADI6                                                                                                                                                                                                                                                                                                                               |
|                                   | Biochemical measures                                                    | Biochemical measures                                            | RAP1GDS1, GRIK2, SLC2A9, NR3C2, PKNOX1, ZCCHC16, PCSK2, CETP                                                                                                                                                                                                                                                                        |
|                                   | Biomedical quantitative traits                                          | Biomedical quantitative traits                                  | LOC100128537, C12orf51, FAM3C, FTO                                                                                                                                                                                                                                                                                                  |
|                                   | Bipolar disorder                                                        | Bipolar disorder                                                | CACNA1C, DGKH, ITIH1, TDRD9, LOC100132577, SYNE1, MCTP1, DPY19L3, PRSS3, CTSF, ARNT2, RNPEPL1, CDC25B, ZNF385D, GARNL3, PALB2, CMTM8, SIAE, C2orf55, LAMP3, SVEP1, ATP8B3, NPAS3, C15orf32                                                                                                                                          |
| risk factor of metabolic syndrome | Birth weight finding                                                    | Birth weight                                                    | ADCY5                                                                                                                                                                                                                                                                                                                               |
| risk factor of metabolic syndrome | Blood pressure finding                                                  | Blood pressure                                                  | CAMK4, C14orf118, CDH13, CNTN4, STK39                                                                                                                                                                                                                                                                                               |
|                                   |                                                                         | <b>Diastolic blood pressure</b>                                 | CACNB2, PLEKHA7, CSK, C10orf107, ZNF652, MDS1, ATP2B1, SH2B3, ATXN2, ULK4                                                                                                                                                                                                                                                           |
| brain function                    |                                                                         | Cognitive performance                                           | IMMP2L, MTHFD1, TSHZ3, CCDC64, CORO2B, VPS41, GRIK4, FLT1, SPG3A, UNC13C, GRIN2B, NRIP1, KCNB2, CPVL, PKNOX1, KIAA1217, CSMD1, GTF2E2, TRIM31, SEC14L1, FBXO40, CAPN5, CDH13, PLCXD2, LOC100131060, GORASP2, AFAP1L2, NCALD, IDS, PLCB1, C11orf73, FAM177B, EHHADH, LOC100129390, GABRB3, MOBP, SLC6A6, C6orf129, KIAA0984, FAM131C |
|                                   |                                                                         | Cognitive test performance                                      | NCAPD3, TARBP1, PPM1E, PPP2R2B                                                                                                                                                                                                                                                                                                      |
|                                   |                                                                         | Functional MRI                                                  | KIAA0355, DOK5                                                                                                                                                                                                                                                                                                                      |
|                                   |                                                                         | Hyperactive-impulsive symptoms                                  | MBOAT1, DMRT2, ZNF805, GRIK1, MEIS2                                                                                                                                                                                                                                                                                                 |
|                                   |                                                                         | Inattentive symptoms                                            | LOC100127988, ZNF423, NOS1, IL16, SLCO3A1                                                                                                                                                                                                                                                                                           |
|                                   |                                                                         | Major mood disorders                                            | PBRM1                                                                                                                                                                                                                                                                                                                               |
|                                   |                                                                         | Nicotine dependence                                             | CHRNA3, CTNNA3                                                                                                                                                                                                                                                                                                                      |
|                                   |                                                                         | Personality dimensions                                          | FUNDC1, CLOCK                                                                                                                                                                                                                                                                                                                       |
|                                   |                                                                         | Response to antidepressants                                     | IL11, SLC27A1, UST, RGL1                                                                                                                                                                                                                                                                                                            |
|                                   |                                                                         | Response to antipsychotic therapy (extrapyramidal side effects) | C20orf174, MOSC2, FAM13A1, FLJ10986, ZNF202, TRIM44, A2BP1                                                                                                                                                                                                                                                                          |
|                                   |                                                                         | Response to antipsychotic treatment                             | LCE3E, CLMN, PRKAR2B, ATF7IP2, SOX5, LOC729993, MEIS2, CDH13, FHOD3, CNTNAP5, TRPM1, GPR98, ASTN2, KIRREL3, RNF144A, ANKS1B, PPARD                                                                                                                                                                                                  |



**Supplementary Table 1. Manual Curation of textual terms representing complex traits and diseases in NHGRI GWAS Catalog.**

| <b>Metatrait</b>   | <b>Complex Trait and Diseases (Curated Concept Used for Similarity Metric)</b> | <b>Complex Trait and Diseases (Original NHGRI Term)</b> | <b>Host Gene (dbSNP)</b>                                                                                                                                                                                                                                                                                                   |
|--------------------|--------------------------------------------------------------------------------|---------------------------------------------------------|----------------------------------------------------------------------------------------------------------------------------------------------------------------------------------------------------------------------------------------------------------------------------------------------------------------------------|
|                    | brain structure                                                                | Brain imaging                                           | TOMM40, APOE                                                                                                                                                                                                                                                                                                               |
|                    |                                                                                | Brain structure                                         | BOK, CADPS2, CSMD2, FARP1, KIAA0090, FRMD6, SHB, C6orf140                                                                                                                                                                                                                                                                  |
|                    |                                                                                | Normalized brain volume                                 | KCNIP1, SVIL, BICD1, MXI1, FOXO3                                                                                                                                                                                                                                                                                           |
|                    |                                                                                | Volumetric brain MRI                                    | CDH4, CNTN5                                                                                                                                                                                                                                                                                                                |
|                    | cardiac function                                                               | Cardiac structure and function                          | FLJ43080, WWOX, GRID1, SLC35F1                                                                                                                                                                                                                                                                                             |
|                    |                                                                                | Echocardiographic traits                                | PDE4B, KCNB2, SLIT2, FAM5C                                                                                                                                                                                                                                                                                                 |
|                    |                                                                                | Electrocardiographic conduction measures                | SFRP2, STK32B, XYLB, LOC100133877, SCN5A                                                                                                                                                                                                                                                                                   |
|                    |                                                                                | Electrocardiographic traits                             | NOS1AP, SCN5A, KCNQ1, MYH6, CNOT1, KCNH2, CAV1, TBX5, SCN10A, KCNE1, ARHGAP24                                                                                                                                                                                                                                              |
| metabolic syndrome | cardiovascular finding                                                         | Arterial stiffness                                      | COL4A1                                                                                                                                                                                                                                                                                                                     |
|                    |                                                                                | Endothelial function traits                             | OBFC1                                                                                                                                                                                                                                                                                                                      |
|                    |                                                                                | Exercise treadmill test traits                          | WRN, RYR2, ZC3H12C                                                                                                                                                                                                                                                                                                         |
|                    |                                                                                | Heart rate variability traits                           | DCLK1                                                                                                                                                                                                                                                                                                                      |
|                    | cardiovascular function                                                        | PR interval                                             | SCN5A, MEIS1, CAV1, WNT11, SCN10A, ARHGAP24                                                                                                                                                                                                                                                                                |
| metabolic syndrome | Celiac disease                                                                 | Celiac disease                                          | BACH2, MYNN, ETS1, CDGAP, ZMIZ1, PUS10, LOC729026, KIAA1109, LPP, PLEK, TAGAP, PTPN2, WNT3, HLA-DQA1, YDJC, MMEL1, ICOS, ICOSLG, ATXN2, NFIA, FRMD4B, ELMO1, CD247                                                                                                                                                         |
|                    | Cerebrovascular accident                                                       | Stroke                                                  | IMPA2, AIM1                                                                                                                                                                                                                                                                                                                |
| cancer             | Chronic leukemia                                                               | Chronic lymphocytic leukemia                            | PRKD2, SP140, ACOXL, FARP2, CPEB1, IRF4                                                                                                                                                                                                                                                                                    |
|                    | Chronic obstructive lung disease                                               | Chronic obstructive pulmonary disease                   | IREB2, FAM13A1, LOC123688                                                                                                                                                                                                                                                                                                  |
|                    | Chronic renal impairment                                                       | Chronic kidney disease                                  | SLC6A13, WDR37, DAB2, SLC7A9, GCKR, NAT8, UBE2Q2, SHROOM3, SLC22A2, PIP5K1B, WDR72, DACH1, SLC34A1, ATXN2, PRKAG2, BCAS3                                                                                                                                                                                                   |
|                    |                                                                                | Renal function and chronic kidney disease               | SHROOM3, SPATA5L1                                                                                                                                                                                                                                                                                                          |
|                    | Coagulation factor VII (substance)                                             | Factor VII                                              | F7                                                                                                                                                                                                                                                                                                                         |
|                    | Conduct disorder                                                               | Conduct disorder (interaction)                          | ZBTB16, RIT1, MFHAS1, A2BP1, PPM1K, SLC6A1                                                                                                                                                                                                                                                                                 |
| metabolic syndrome | Coronary arteriosclerosis                                                      | Coronary artery disease                                 | SLC22A3, LPAL2, LPA, HNF1A, MRAS                                                                                                                                                                                                                                                                                           |
|                    | Crohn's disease                                                                | Crohn's disease                                         | ATG16L1, NKX2-3, C1orf141, IL23R, NOD2, NELL1, LOC441108, ITLN1, FGFR1OP, PTPN22, FLJ45139, MST1, C13orf31, TNFSF15, CDKAL1, STAT3, BSN                                                                                                                                                                                    |
| metabolic syndrome | diabetes II or I                                                               | Glycated hemoglobin levels                              | SLC30A8, G6PC2, HK1, GCK                                                                                                                                                                                                                                                                                                   |
| metabolic syndrome | Diabetes mellitus                                                              | Diabetes (incident)                                     | TMEFF2                                                                                                                                                                                                                                                                                                                     |
|                    |                                                                                | Diabetes related insulin traits                         | CPVL, LOC728755                                                                                                                                                                                                                                                                                                            |
| metabolic syndrome | Diabetes mellitus type 1                                                       | Type 1 diabetes                                         | IGF2, GLIS3, UBASH3A, PRKCQ, BACH2, CLEC16A, CAPSL, C14orf181, DNAH2, FSTL4, ADAD1, C12orf30, PTPN2, EDG7, IFIH1, PGM1, SIRPG, GSDML, ERBB3, TYK2, PTPN22, GAB3, CTLA4, SH2B3, INS-IGF2, CLEC2D, CTSH, TNP2, PRKD2, KIAA1109, CD69, LOC729980, IL7R, CD226, SKAP2, RASGRP1, HLA-DRA, HLA-DQA1, LOC100130955, DKFZp667F0711 |
| metabolic syndrome | Diabetes mellitus type 2                                                       | Type 2 diabetes                                         | NOTCH2, CDKAL1, HIGD1C, SLC30A8, PTPRD, PPARG, KCNQ1, SRR, IGF2BP2, TCF7L2, LOC730057, KCNJ11, THADA, RBMS1, FTO, JAZF1                                                                                                                                                                                                    |

**Supplementary Table 1. Manual Curation of textual terms representing complex traits and diseases in NHGRI GWAS Catalog.**

| <b>Metatrait</b>                  | <b>Complex Trait and Diseases (Curated Concept Used for Similarity Metric)</b> | <b>Complex Trait and Diseases (Original NHGRI Term)</b> | <b>Host Gene (dbSNP)</b>                                                            |                                                                                                                                                                                                |
|-----------------------------------|--------------------------------------------------------------------------------|---------------------------------------------------------|-------------------------------------------------------------------------------------|------------------------------------------------------------------------------------------------------------------------------------------------------------------------------------------------|
| metabolic syndrome                | Fasting Glucose (Diabetes-related)                                             | Fasting glucose-related traits                          | MTNR1B, SLC30A8, CRY2, ADCY5, SLC2A2, FADS1, IGF1, TCF7L2, G6PC2, GLIS3, GCKR, MADD |                                                                                                                                                                                                |
|                                   |                                                                                | Fasting insulin-related traits                          | IGF1, GCKR                                                                          |                                                                                                                                                                                                |
|                                   |                                                                                | Fasting plasma glucose                                  | MTNR1B, PRDM5, ZMAT4, G6PC2                                                         |                                                                                                                                                                                                |
| metabolic syndrome                | Diabetic renal disease                                                         | Diabetic nephropathy                                    | ELMO1                                                                               |                                                                                                                                                                                                |
| metabolic syndrome                | Disorder of coronary artery                                                    | Coronary disease                                        | SMAD3, MIA3, FMN2, PSRC1, SEZ6L, MTHFD1L, CDH13                                     |                                                                                                                                                                                                |
|                                   | Drowsy                                                                         | Sleepiness                                              | PDE4D, EYA1                                                                         |                                                                                                                                                                                                |
|                                   | Eosinophilic esophagitis                                                       | Eosinophilic esophagitis (pediatric)                    | SNTB1, SHROOM3, C8orf47, STAT6, TSLP, DSG1                                          |                                                                                                                                                                                                |
| risk factor of metabolic syndrome | Exercise (leisure time)                                                        | Exercise (leisure time)                                 | PAPSS2                                                                              |                                                                                                                                                                                                |
|                                   | eye function                                                                   | Tonometry                                               | EXOC4, SYNE1, CNTNAP5, SLC9A9, TNR, TGFB2, VPS37A, PREX1, MEF2C                     |                                                                                                                                                                                                |
|                                   | F-cell distribution                                                            | F-cell distribution                                     | BCL11A                                                                              |                                                                                                                                                                                                |
|                                   | Finding of bilirubin level                                                     | Bilirubin levels                                        | TKTL1, UGT1A4                                                                       |                                                                                                                                                                                                |
|                                   | Finding of tobacco smoking behavior                                            | Smoking behavior                                        | ZNF93, CHRNA3, CABLES1, ACTN1, EGLN2, BDNF, BBX, TRPC5, CYP2B6, CAMKK1              |                                                                                                                                                                                                |
|                                   | Folate pathway vitamin levels                                                  | Folate pathway vitamin levels                           | CUBN, NBPF3, TCN1, FUT2                                                             |                                                                                                                                                                                                |
|                                   | Gallbladder calculus                                                           | Gallstones                                              | ABCG8                                                                               |                                                                                                                                                                                                |
|                                   | Glaucoma                                                                       | Glaucoma<br>Glaucoma (exfoliation)                      | SRBD1<br>LOXL1                                                                      |                                                                                                                                                                                                |
| cancer                            | Glioma                                                                         | Glioma                                                  | TERT, PHLDB1, RTEL1                                                                 |                                                                                                                                                                                                |
|                                   |                                                                                | Glioma (high-grade)                                     | RTEL1                                                                               |                                                                                                                                                                                                |
|                                   | Hearing loss                                                                   | Hearing impairment                                      | PTPRK, IQGAP2                                                                       |                                                                                                                                                                                                |
| risk factor of metabolic syndrome | Heart failure                                                                  | Mortality among heart failure patients                  | CMTM7, IFRD1, OTUD7A, ADAMTS12, PARVA, GPM6A                                        |                                                                                                                                                                                                |
|                                   | hematological finding                                                          | heart function                                          | RR interval (heart rate)                                                            | FRMD4A, RASGRF1, AKT3, GPR133                                                                                                                                                                  |
|                                   |                                                                                | Hematocrit                                              |                                                                                     | PRKCE, PRKAG2, HK1, HFE, TMPRSS6, TFR2                                                                                                                                                         |
|                                   |                                                                                | Hematological and biochemical traits                    |                                                                                     | PRKCE, WDR72, LOC387867, GCKR, 8-Mar, RPS11, MRC1, LRP2, TERT, PSORS1C1, CCND3, BRAP, TNFRSF13B, CDK6, SLC12A7, ECGF1, UBE2L3, SLC14A2, GP1BA, DENND4A, TMEM79, ALDH2, TIMM23, XPO7, ABO, THRB |
|                                   |                                                                                | Hematological parameters                                |                                                                                     | PTPN11, HFE, FIG4, TMPRSS6, TFR2                                                                                                                                                               |
|                                   |                                                                                | Hemoglobin                                              |                                                                                     | PRKAG2, PRKCE, HK1, HFE, TMPRSS6                                                                                                                                                               |
|                                   |                                                                                | Hemoglobin levels                                       |                                                                                     | HIST1H1T, TMPRSS6                                                                                                                                                                              |
|                                   |                                                                                | Hemostatic factors and hematological phenotypes         |                                                                                     | NEGR1, OR9G1, C1orf149                                                                                                                                                                         |
|                                   |                                                                                | Mean corpuscular hemoglobin                             |                                                                                     | RCL1, GCDH, ITFG3, TFRC, TMPRSS6                                                                                                                                                               |
|                                   |                                                                                | Mean corpuscular volume                                 |                                                                                     | RCL1, 8-Mar, IKZF1, LOC440836, HFE, TMPRSS6, FNTB, ITFG3, C6orf184, TFRC                                                                                                                       |
|                                   |                                                                                | Mean forced vital capacity from 2 exams                 |                                                                                     | COL1A2                                                                                                                                                                                         |
|                                   |                                                                                | Mean platelet volume                                    |                                                                                     | NFE2, DNM3, TPM1, BET1L, RNF145, TMCC2, JMJD1C, MACROD2, EHD3, WDR66                                                                                                                           |
|                                   |                                                                                | Neutrophil count                                        |                                                                                     | PLCB4                                                                                                                                                                                          |
|                                   |                                                                                | Plasma coagulation factors                              |                                                                                     | PROCR, STXB5                                                                                                                                                                                   |
|                                   |                                                                                | Plasma eosinophil count                                 |                                                                                     | IL1RL1, TNXB, WDR36, SH2B3                                                                                                                                                                     |
|                                   |                                                                                | <b>Other erythrocyte phenotypes</b>                     |                                                                                     | ZAN, SPTA1                                                                                                                                                                                     |

**Supplementary Table 1. Manual Curation of textual terms representing complex traits and diseases in NHGRI GWAS Catalog.**

| <b>Metatrait</b>                  | <b>Complex Trait and Diseases (Curated Concept Used for Similarity Metric)</b> | <b>Complex Trait and Diseases (Original NHGRI Term)</b> | <b>Host Gene (dbSNP)</b>                                                                                                                                 |                              |
|-----------------------------------|--------------------------------------------------------------------------------|---------------------------------------------------------|----------------------------------------------------------------------------------------------------------------------------------------------------------|------------------------------|
|                                   | Hemoglobin E/beta                                                              | Beta thalassemia/hemoglobin                             | BCL11A                                                                                                                                                   |                              |
|                                   | thalassemia disease                                                            | E disease                                               |                                                                                                                                                          |                              |
|                                   | Hirschsprung's disease                                                         | Hirschsprung's disease                                  | NRG1, RET                                                                                                                                                |                              |
|                                   | HIV                                                                            | HIV-1 control                                           | DAB1, LOC728989, TNXB, GPC5, GRIN2A, GRM5, SLC05A1, NBEA, KIAA0194, HCP5, HLA-B, WDR27, BTNL2, PSORS1C1, MCM8, EVI5L, AOA, LOC100133373, C6orf48, TRIM10 |                              |
| metabolic syndrome                | Hypertensive disorder                                                          | Hypertension                                            | CACNB2, MSRA, LOC100132798, ATP2B1                                                                                                                       |                              |
|                                   | Idiopathic fibrosing alveolitis                                                | Idiopathic pulmonary fibrosis                           | TERT                                                                                                                                                     |                              |
|                                   | immune system                                                                  | Plasma C4b binding protein levels                       | C4BPB                                                                                                                                                    |                              |
|                                   |                                                                                | Serum IgE levels                                        | RAD50, FCER1A                                                                                                                                            |                              |
|                                   | inflammation                                                                   | Fibrinogen                                              | RAB37, NLRP3, FGB                                                                                                                                        |                              |
|                                   | C-reactive protein                                                             | C-reactive protein                                      | LOC644171, HNF1A, TOMM40, CRP, APOC1, IL6R, LEPR, APOE, GCKR                                                                                             |                              |
|                                   | inflammation (morphology)                                                      | Interleukin-18 levels                                   | IL18, BCDO2                                                                                                                                              |                              |
|                                   | Inflammatory bowel disease                                                     | Inflammatory bowel disease                              | IL23R, NOD2, ZGPAT, TNFSF15                                                                                                                              |                              |
|                                   |                                                                                | Inflammatory bowel disease (early onset)                | ZMIZ1, HORMAD2, ATXN2L                                                                                                                                   |                              |
|                                   | Injury of liver                                                                | Drug-induced liver injury (flucloxacillin)              | ST6GAL1, HCP5, MCTP2                                                                                                                                     |                              |
|                                   | integument color                                                               | Black vs. blond hair color                              | IRF4, HERC2, SLC45A2, EXOC2, GPC5                                                                                                                        |                              |
|                                   |                                                                                | Black vs. red hair color                                | IRF4, HERC2, CDK10, SLC45A2, EXOC2, GPC5                                                                                                                 |                              |
|                                   |                                                                                | Blond vs. brown hair color                              | HERC2, MC1R, TPCN2                                                                                                                                       |                              |
|                                   |                                                                                | Blue vs. brown eyes                                     | HERC2                                                                                                                                                    |                              |
|                                   |                                                                                | Blue vs. green eyes                                     | TYR, HERC2                                                                                                                                               |                              |
|                                   |                                                                                | Hair morphology                                         | TCHH, FRAS1, THADA, WNT10A, TSHR                                                                                                                         |                              |
|                                   |                                                                                | Iris color                                              | HERC2                                                                                                                                                    |                              |
|                                   |                                                                                | Red vs non-red hair color                               | MC1R                                                                                                                                                     |                              |
|                                   |                                                                                | Skin pigmentation                                       | TYR, SLC45A2                                                                                                                                             |                              |
|                                   |                                                                                | Skin sensitivity to sun                                 | TYR, MC1R                                                                                                                                                |                              |
|                                   |                                                                                | Tanning                                                 | GRM5, DBNDD1, TYR, PPARGC1B, SLC45A2, PRDM15                                                                                                             |                              |
|                                   |                                                                                | Intracranial aneurysm                                   | Intracranial aneurysm                                                                                                                                    | CNNM2, BOLL, SEC11B, STARD13 |
| metabolic syndrome                |                                                                                | Ischemic stroke                                         | Ischemic stroke                                                                                                                                          | LOC729065                    |
|                                   | <b>Creutzfeldt-Jakob disease</b>                                               | Creutzfeldt-Jakob disease                               | PRNP                                                                                                                                                     |                              |
|                                   | Juvenile idiopathic arthritis                                                  | Arthritis (juvenile idiopathic)                         | VTCN1, C6orf10                                                                                                                                           |                              |
| risk factor of metabolic syndrome | Kawasaki's disease                                                             | Kawasaki disease                                        | NAALADL2, ZFH3                                                                                                                                           |                              |
|                                   | Kidney stone                                                                   | Kidney stones                                           | CLDN14                                                                                                                                                   |                              |
|                                   | Left ventricular mass                                                          | Left ventricular mass                                   | CD36                                                                                                                                                     |                              |
|                                   | Lentigo                                                                        | Freckles                                                | TYR, MC1R                                                                                                                                                |                              |
|                                   | Leprosy                                                                        | Leprosy                                                 | C13orf31, RIPK2, TNFSF15                                                                                                                                 |                              |
|                                   | Lesion of brain                                                                | Brain lesion load                                       | CPAMD8, IGF2R                                                                                                                                            |                              |
|                                   | liver function                                                                 | Plasma levels of liver enzymes                          | LOC100128604, C12orf43, JMJD1C, PNPLA3, C22orf36, C9orf7, ABO, GPLD1                                                                                     |                              |

**Supplementary Table 1. Manual Curation of textual terms representing complex traits and diseases in NHGRI GWAS Catalog.**

| Metatrait                         | Complex Trait and Diseases (Curated Concept Used for Similarity Metric) | Complex Trait and Diseases (Original NHGRI Term)          | Host Gene (dbSNP)                                                                                                                                       |
|-----------------------------------|-------------------------------------------------------------------------|-----------------------------------------------------------|---------------------------------------------------------------------------------------------------------------------------------------------------------|
|                                   | Major depressive disorder                                               | Bipolar disorder and major depressive disorder (combined) | CACNA1C, DMTF1, FAT4, SYNE1, LOC100133877                                                                                                               |
|                                   |                                                                         | Major depressive disorder                                 | ATXN7L2, SP4, GNAI3                                                                                                                                     |
|                                   |                                                                         | Major depressive disorder (broad)                         | ATP6V1B2, SP4, LY86, GRM7                                                                                                                               |
|                                   | Malaria                                                                 | Malaria                                                   | DDC                                                                                                                                                     |
|                                   | Male infertility                                                        | Male infertility                                          | PDE3A, EFCAB4B                                                                                                                                          |
| cancer                            | Malignant neoplastic disease                                            | Colorectal cancer                                         | RHPN2, FLJ45803, SMAD7, CDH1                                                                                                                            |
|                                   |                                                                         | Melanoma                                                  | TYR, PLA2G6, CDK10, MTAP, PIGU                                                                                                                          |
| cancer                            | Malignant tumor of breast                                               | Breast cancer                                             | FGFR2, FBN1, ABCC4, COL1A1, RNF146, LOC643714, LSP1, GRIK1, HCN1, RAD51L1                                                                               |
| cancer                            | Malignant tumor of esophagus                                            | Esophageal cancer                                         | ADH1B, ALDH2                                                                                                                                            |
| cancer                            | Malignant tumor of lung                                                 | Lung cancer                                               | CHRNA3, RBMS3, GPC5, BAT3, CLPTM1L, TGM5, IL1RAP, LOC123688                                                                                             |
| cancer                            | Malignant tumor of nasopharynx                                          | Nasopharyngeal carcinoma                                  | ITGA9, HLA-A                                                                                                                                            |
| cancer                            | Malignant tumor of pancreas                                             | Pancreatic cancer                                         | NR5A2, CLPTM1L, ABO                                                                                                                                     |
| cancer                            | Malignant tumor of prostate                                             | Prostate cancer                                           | JAZF1, PKHD1, EEFSEC, MSMB, PDLIM5, ITGA6, THADA, HNF1B,                                                                                                |
|                                   |                                                                         |                                                           | HAPLN1, CTBP2, LMTK2, EHP1, CTDSPL, SLC22A3, TNRC6B                                                                                                     |
| cancer                            | Malignant tumor of urinary bladder                                      | Bladder cancer                                            | PSCA                                                                                                                                                    |
|                                   |                                                                         | Urinary bladder cancer                                    | TACC3                                                                                                                                                   |
| metabolic syndrome                | Mass of body structure                                                  | Body mass (lean)                                          | TRHR                                                                                                                                                    |
|                                   |                                                                         | Body mass index                                           | STK33, MTCH2, SEC16B, FTO, LPP, LOC100132353, BDNF, SH2B1                                                                                               |
| risk factor of metabolic syndrome | Menarche (age at onset)                                                 | Menarche (age at onset)                                   | LIN28B, LOC100129852                                                                                                                                    |
| risk factor of metabolic syndrome | Menarche and menopause (age at onset)                                   | Menarche and menopause (age at onset)                     | BRSK1, MCM8, SYCP2L, LIN28B, UIMC1                                                                                                                      |
|                                   | Menopause (age at onset)                                                | Menopause (age at onset)                                  | BRSK1, LOC642340, C20orf75, MCM8, BANP, DYNC1H1, SLC44A4, GPR124                                                                                        |
|                                   | Multiple sclerosis                                                      | Multiple sclerosis                                        | KIF1B, DBC1, CLEC16A, ZMIZ1, IL2RA, CD58, PDZRN4, CSMD1, CD6, MPHOSPH9, TNFRSF1A, C6orf10, HLA-DRA, FAM69A, IL7R, DDEF1, CYP27B1, STAT3, HLA-DRB5, GPC5 |
|                                   |                                                                         | Multiple sclerosis (age of onset)                         | C1orf125, NAP5, RELN                                                                                                                                    |
|                                   |                                                                         | Multiple sclerosis (severity)                             | MET, FLJ16641, NLRP11                                                                                                                                   |
| cancer                            | myeloproliferative disorder                                             | Myeloproliferative neoplasms                              | JAK2                                                                                                                                                    |
| metabolic syndrome                | Myocardial infarction                                                   | Myocardial infarction (early onset)                       | SMARCA4, PHACTR1, MIA3, CELSR2, WDR12                                                                                                                   |
|                                   | Narcolepsy                                                              | Narcolepsy                                                | CHKB-CPT1B                                                                                                                                              |
| cancer                            | Neoplasm of testis                                                      | Testicular cancer                                         | KITLG                                                                                                                                                   |
| cancer                            | Neuroblastoma                                                           | Neuroblastoma (high-risk)                                 | BARD1                                                                                                                                                   |
|                                   | Neurosis                                                                | Neuroticism                                               | MDGA2, NXPH1, PDE4D                                                                                                                                     |
|                                   | nevi (skin)                                                             | Cutaneous nevi                                            | PLA2G6                                                                                                                                                  |
|                                   | Nonsyndromic cleft lip with or without cleft palate                     | Nonsyndromic cleft lip with or without cleft palate       | THADA                                                                                                                                                   |

**Supplementary Table 1. Manual Curation of textual terms representing complex traits and diseases in NHGRI GWAS Catalog.**

| <b>Metatrait</b>   | <b>Complex Trait and Diseases (Curated Concept Used for Similarity Metric)</b> | <b>Complex Trait and Diseases (Original NHGRI Term)</b>  | <b>Host Gene (dbSNP)</b>                                                                                                                                                                           |
|--------------------|--------------------------------------------------------------------------------|----------------------------------------------------------|----------------------------------------------------------------------------------------------------------------------------------------------------------------------------------------------------|
| metabolic syndrome | Obesity                                                                        | Adiposity                                                | LOC728510, TBCE, TFAP2B                                                                                                                                                                            |
|                    |                                                                                | Obesity                                                  | FTO, NPC1                                                                                                                                                                                          |
|                    |                                                                                | Obesity (early onset extreme)                            | FTO                                                                                                                                                                                                |
|                    |                                                                                | Obesity (extreme)                                        | TMEM16C, RFTN1, RARB, FTO, MLN, FBN2, MACROD2, FLJ42562, ITPR3                                                                                                                                     |
|                    |                                                                                | Obesity and osteoporosis                                 | SOX6                                                                                                                                                                                               |
|                    |                                                                                | Obesity-related traits                                   | FTO                                                                                                                                                                                                |
|                    | Optic disc size                                                                | Optic disc size (cup)                                    | DENND2A, ESRRG, SCFD2, RFTN1                                                                                                                                                                       |
|                    |                                                                                | Optic disc size (disc)                                   | LRP1B, MYPN                                                                                                                                                                                        |
|                    |                                                                                | Optic disc size (rim)                                    | PEX14, TSHR, MYH9                                                                                                                                                                                  |
|                    | Osteoarthritis                                                                 | Osteoarthritis                                           | COG5                                                                                                                                                                                               |
|                    | Osteoarthritis of knee                                                         | Knee osteoarthritis                                      | BTNL2, PARD3B                                                                                                                                                                                      |
|                    | Osteoporosis                                                                   | Osteoporosis                                             | ALDH7A1                                                                                                                                                                                            |
| metabolic syndrome | Other metabolic traits                                                         | Other metabolic traits                                   | PANK1, GCKR, G6PC2, APOB                                                                                                                                                                           |
|                    | Otosclerosis                                                                   | Otosclerosis                                             | RELN                                                                                                                                                                                               |
|                    | Panic disorder                                                                 | Panic disorder                                           | TMEM16B, TNFRSF21, GRM7, SDK2, PKP1, CALCOCO1                                                                                                                                                      |
|                    | Parkinson's disease                                                            | Parkinson's disease                                      | DLG2, LOC201175, DGKQ, CYP17A1, SLC2A13, NSF, STAP1, SNCA, LOC100133430, DBC1, LOC100129583, ITGA8, SEMA5A, NUCKS1                                                                                 |
|                    |                                                                                | Parkinson's disease (age of onset)                       | ATF6, DSG3, AAK1                                                                                                                                                                                   |
|                    |                                                                                | Parkinson's disease (familial)                           | GAK                                                                                                                                                                                                |
|                    | Periodontitis                                                                  | Periodontitis                                            | GLT6D1                                                                                                                                                                                             |
|                    | Plasma level of vitamin B12                                                    | Plasma level of vitamin B12                              | FUT2                                                                                                                                                                                               |
|                    | Primary biliary cirrhosis                                                      | Primary biliary cirrhosis                                | C6orf10, IL12RB2, IKZF3                                                                                                                                                                            |
|                    | Primary tooth development (number of teeth)                                    | Primary tooth development (number of teeth)              | MSRB3, RAD51L1, IGF2BP1                                                                                                                                                                            |
|                    |                                                                                | Primary tooth development (time to first tooth eruption) | MSRB3, EDA, IGF2BP1                                                                                                                                                                                |
|                    | Protein quantitative trait loci                                                | Protein quantitative trait loci                          | DUT, LOC51057, CTNNA2, DOCK2, STARD9, EPS8, KIRREL3, KCNQ1, BCDO2, DLG2, IL6R, SACS, BCMO1, ABO, GGT1, KHDRBS2, FLJ39080, POLR2A, IL1F10, SASH1, CACNB2, PAFAH1B2, LPA, ANGPTL6, C17orf62, OSBPL1A |
|                    | Psoriasis                                                                      | Psoriasis                                                | TSC1, IL13, STAT2, IL23R, HCP5, IL12B, SPATA2, TNFAIP3                                                                                                                                             |
|                    | Pulmonary function                                                             | Pulmonary function                                       | GSTCD, HTR4, INTS12, THSD4, PTCH1, AGER, ADAM19, DAAM2, TNS1, FAM13A1, GPR126                                                                                                                      |
|                    | Pulmonary function traits (other)                                              | Pulmonary function traits (other)                        | ADARB1, SNTG1, RHBDD1, SNRPN, IL6R, NID2                                                                                                                                                           |
|                    | QT interval                                                                    | QT interval                                              | ELMO1, ATP1B1, SCN5A, NOS1AP, KCNQ1, TTN, PDE3A, LIG3, CNOT1, PTPRG, ARHGAP10, TMEM44, TCL6, LITAF, RNF207                                                                                         |
|                    |                                                                                | QT interval prolongation                                 | NOS1AP                                                                                                                                                                                             |
|                    | Quantitative traits                                                            | Quantitative traits                                      | SPPL3, CUBN, LOC283440, ARHGAP15, TRIM24, SCHIP1, HMGR, APOC1, SDK1, MGAT1, ADARB2, CACNB2, HEMGN, LOC388931, ITGA8                                                                                |
|                    | Recombination rate (females)                                                   | Recombination rate (females)                             | RNF212                                                                                                                                                                                             |
|                    | Recombination rate (males)                                                     | Recombination rate (males)                               | RNF212                                                                                                                                                                                             |
|                    | Response to citalopram treatment                                               | Response to citalopram treatment                         | NOL4, RORA                                                                                                                                                                                         |
|                    | Response to diuretic therapy                                                   | Response to diuretic therapy                             | YEATS4                                                                                                                                                                                             |

**Supplementary Table 1. Manual Curation of textual terms representing complex traits and diseases in NHGRI GWAS Catalog.**

| Metatrait                         | Complex Trait and Diseases (Curated Concept Used for Similarity Metric) | Complex Trait and Diseases (Original NHGRI Term)       | Host Gene (dbSNP)                                                                                                                               |
|-----------------------------------|-------------------------------------------------------------------------|--------------------------------------------------------|-------------------------------------------------------------------------------------------------------------------------------------------------|
|                                   | Response to hepatitis C treatment                                       | Response to hepatitis C treatment                      | C6orf199                                                                                                                                        |
|                                   | Response to iloperidone treatment (QT prolongation)                     | Response to iloperidone treatment (QT prolongation)    | PALLD, SLCO3A1, BRUNOL4, NRG3, NUBPL, CERKL                                                                                                     |
|                                   | Response to statin therapy                                              | Response to statin therapy                             | SLC28A3, COBLL1, ASB18, FADS2, TTC7A, CNTNAP5, BAI3, SLCO1B1, CELSR2, GLIS1, PRDM16, SOX5, CLMN                                                 |
|                                   | Response to TNF antagonist treatment                                    | Response to TNF antagonist treatment                   | LASS6, MOBKL2B, PON1                                                                                                                            |
|                                   | Response to treatment for acute lymphoblastic leukemia                  | Response to treatment for acute lymphoblastic leukemia | LMBRD2, ST8SIA6, ELMO1, NCOA3, DGKB, MAML2, LOC645490                                                                                           |
|                                   | Restless legs                                                           | Restless legs syndrome                                 | MAP2K5, PTPRD, MEIS1, BTBD9                                                                                                                     |
|                                   | Rheumatoid arthritis                                                    | Rheumatoid arthritis                                   | LOC344423, KIF5A, PTPN22, CCL21, TRAF1, ANAPC4, MMEL1, CDK6, DKFZp667F0711, CD40, PHF19                                                         |
|                                   | risk factor of atherosclerosis-0                                        | Plasma homocysteine                                    | MTHFR, CBS                                                                                                                                      |
|                                   |                                                                         | LDL cholesterol                                        | SF4, DOCK7, PCSK9, HMGCR, DNAH11, CELSR2, TOMM40, FADS1, FADS2, LDLR, COL11A2, ZNF101, APOC1, CR1L, AR, PSRC1, ABCG8, ZNF259, ABCG5, APOB, GCKR |
| risk factor of metabolic syndrome | risk factor of atherosclerosis-0.5                                      | Plasma Lp (a) levels                                   | LPA                                                                                                                                             |
| metabolic syndrome                | risk factor of atherosclerosis-1                                        | Adiponectin levels                                     | ADIPOQ, ARL15                                                                                                                                   |
|                                   |                                                                         | Cholesterol                                            | CETP                                                                                                                                            |
|                                   |                                                                         | Cholesterol, total                                     | DOCK7, TMEM57, DNAH11, FADS2, TOMM40, LDLR, ZNF101, HMGCR, CELSR2, ABCG5, APOB                                                                  |
|                                   |                                                                         | HDL cholesterol                                        | CETP, TOMM40, FADS1, FADS2, LIPC, HNF4A, ABCA1, GALNT2, NUTF2, KCTD10, DPEP3, DPEP2, LPL, C9orf52, NR1H3, PCIF1, ZNF259                         |
|                                   |                                                                         | Subclinical atherosclerosis traits (other)             | ABI2, DNAH5, WDFY4                                                                                                                              |
| risk factor of metabolic syndrome | risk factor of diabetes and of obesity                                  | Plasma chemerin levels                                 | GRM8, PI16, EDIL3                                                                                                                               |
|                                   | risk factor rheumatoid arthritis                                        | Anti-cyclic Citrullinated Peptide Antibody             | BTNL2                                                                                                                                           |
| risk factor of metabolic syndrome | risk of atherosclerosis                                                 | Triglycerides                                          | DOCK7, DSCAML1, ZNF259, GCKR, TBL2, FADS1, CETP, KIAA0999, GALNT2, BAZ1B, ZNF101, BUD13, LPL, MLXIPL, LOC100129500, APOC1, APOB, PCIF1, XKR6    |
| risk factor of metabolic syndrome | risk of cancer                                                          | Telomere length                                        | LOC100133738                                                                                                                                    |
|                                   | risk of diabetes mellitus                                               | Two-hour glucose challenge                             | GIPR, TCF7L2, GCKR, VPS13C, ADCY5                                                                                                               |
| risk factor of metabolic syndrome | risk of gout                                                            | Serum urate                                            | SLC17A3, SLC2A9, ABCG2                                                                                                                          |
|                                   |                                                                         | Serum uric acid                                        | SLC17A1, SLC16A9, SLC2A9, SLC22A11, ABCG2, ARHGAP26, SLC22A12, LRRC16, GCKR                                                                     |
| risk factor of metabolic syndrome | risk of hypertension                                                    | Systolic blood pressure                                | CYP17A1, CACNB2, NT5C2, CASZ1, PLCD3, MTHFR, ATP2B1, SH2B3, PLEKHA7, MDS1                                                                       |
|                                   | Schizophrenia                                                           | Brain imaging in schizophrenia (interaction)           | TNIK                                                                                                                                            |
|                                   |                                                                         | Schizophrenia                                          | ANK3, CCDC60, ZNF804A, ACSM1, AGBL1, TCF4, NOTCH4, PLAA, RELN, HLA-DRB5                                                                         |

**Supplementary Table 1. Manual Curation of textual terms representing complex traits and diseases in NHGRI GWAS Catalog.**

| <b>Metatrait</b>   | <b>Complex Trait and Diseases (Curated Concept Used for Similarity Metric)</b> | <b>Complex Trait and Diseases (Original NHGRI Term)</b> | <b>Host Gene (dbSNP)</b>                                                                                                                                                                                                                                                                                                                                                                                                                                                                                                                                            |
|--------------------|--------------------------------------------------------------------------------|---------------------------------------------------------|---------------------------------------------------------------------------------------------------------------------------------------------------------------------------------------------------------------------------------------------------------------------------------------------------------------------------------------------------------------------------------------------------------------------------------------------------------------------------------------------------------------------------------------------------------------------|
|                    | Select biomarker traits                                                        | Select biomarker traits                                 | UNC13C, DRD2, CADM3, FCER1A, HIF1A                                                                                                                                                                                                                                                                                                                                                                                                                                                                                                                                  |
|                    | Serum bilirubin raised                                                         | Serum bilirubin levels                                  | SLC22A18, SLC01B1, ARHGEF7, UGT1A9                                                                                                                                                                                                                                                                                                                                                                                                                                                                                                                                  |
|                    | Serum creatinine abnormal                                                      | Serum creatinine                                        | SLC22A2, CCDC123, TBX2, SHROOM3                                                                                                                                                                                                                                                                                                                                                                                                                                                                                                                                     |
|                    | Serum iron concentration                                                       | Serum iron concentration                                | TMPRSS6                                                                                                                                                                                                                                                                                                                                                                                                                                                                                                                                                             |
|                    | Serum markers of iron status                                                   | Serum markers of iron status                            | LUZP2, GHR, BTN1A1, LOC100131818, SLC17A1, TF, HFE, ARSB, LRRC16, KLHL13, TMPRSS6                                                                                                                                                                                                                                                                                                                                                                                                                                                                                   |
|                    | Serum matrix metalloproteinase                                                 | Serum matrix metalloproteinase                          | SLC24A3                                                                                                                                                                                                                                                                                                                                                                                                                                                                                                                                                             |
|                    | Serum metabolites                                                              | Serum metabolites                                       | ANKRD30A, GPC5, FADS1, ACADS, ACADL, FGF12, LOC201725, PARK2, A2BP1                                                                                                                                                                                                                                                                                                                                                                                                                                                                                                 |
|                    | skeletal finding                                                               | Height                                                  | HOMER1, HMGA2, PTCH1, ZBTB38, ZNF510, ADAMTSL3, CEP63, SUPT3H, PLAG1, FREM1, NTAN1, PDE3A, CATSPER4, GNA12, EXT1, NUP153, QSOX2, LOC730194, ANKFN1, DOT1L, ZNF678, TNRC6B, HHIP, GPR133, JAZF1, NHEJ1, LCORL, TNXB, CDK6, ETV6, CEP250, TSEN15, C12orf48, CYP19A1, SH3GL3, WDR60, C6orf106, LOC389328, LIN28B, ATP13A2, GPR126, CENTA2, LTBP1, EFEMP1, CABLES1, ADAMTS17, ZNF462, C20orf86, IGF1, BCR, MKL1, UQCC, DGKH, CDH13, PLEKHA1, SCMH1, DIS3L2, EFR3B, DNM3, L3MBTL3, MAP3K3, ADAMTS10, FUBP3, GLT25D2, RAB40C, PAPPA, TRIP11, ACAN, TMED10, COL27A1, PPIL6 |
|                    |                                                                                | Anthropometric traits                                   | GRIA1, SGCD, SEZ6L2, IFI27L1                                                                                                                                                                                                                                                                                                                                                                                                                                                                                                                                        |
|                    |                                                                                | Bone mineral density                                    | RBMS3, ADAMTS18, TGFBR3, CNTNAP2, JAG1, LRP5, CTNNDL1, IL21R                                                                                                                                                                                                                                                                                                                                                                                                                                                                                                        |
|                    |                                                                                | Bone mineral density (hip)                              | CKAP5, C6orf97, C17orf53, HDAC5, GPR177, ZNF408                                                                                                                                                                                                                                                                                                                                                                                                                                                                                                                     |
|                    |                                                                                | Bone mineral density (spine)                            | C6orf97, SPTBN1, GPR177, SP7, HDAC5, LOC344382, LRP5                                                                                                                                                                                                                                                                                                                                                                                                                                                                                                                |
|                    |                                                                                | <b>Digit length ratio</b>                               | LIN28B                                                                                                                                                                                                                                                                                                                                                                                                                                                                                                                                                              |
|                    |                                                                                | Hip bone size                                           | PLCL1                                                                                                                                                                                                                                                                                                                                                                                                                                                                                                                                                               |
|                    |                                                                                | Hip geometry                                            | VAMP1, NRG1, GPR98, KCNH8, PHACTR1                                                                                                                                                                                                                                                                                                                                                                                                                                                                                                                                  |
|                    |                                                                                | Hippocampal atrophy                                     | EFNA5, LOC100129762, MAGI2, MAL2, ZBP1, ARSB, C20orf132                                                                                                                                                                                                                                                                                                                                                                                                                                                                                                             |
|                    |                                                                                | Sleep duration                                          | Sleep duration                                                                                                                                                                                                                                                                                                                                                                                                                                                                                                                                                      |
|                    | Soluble ICAM-1                                                                 | Soluble ICAM-1                                          | ICAM1, ABO, ICAM4                                                                                                                                                                                                                                                                                                                                                                                                                                                                                                                                                   |
|                    | Soluble leptin receptor levels                                                 | Soluble leptin receptor levels                          | LEPR                                                                                                                                                                                                                                                                                                                                                                                                                                                                                                                                                                |
|                    | Soluble levels of adhesion molecules                                           | Soluble levels of adhesion molecules                    | SELP, ICAM1                                                                                                                                                                                                                                                                                                                                                                                                                                                                                                                                                         |
|                    | Sphingolipid concentrations                                                    | Sphingolipid concentrations                             | FADS3, ATP10D                                                                                                                                                                                                                                                                                                                                                                                                                                                                                                                                                       |
|                    | Systemic lupus erythematosus                                                   | Systemic lupus erythematosus                            | TNIP1, BANK1, C10orf64, ITGAM, NTNG2, ETS1, ITGAX, HIP1, NEGR1, RASGRP3, SLC15A4, LRRC18, HLA-DQA1, TNFAIP3, BLK, MSH5, STAT4, KIAA1542, PXX, WDFY4                                                                                                                                                                                                                                                                                                                                                                                                                 |
|                    | Systemic sclerosis                                                             | Systemic sclerosis                                      | CD247, STAT4                                                                                                                                                                                                                                                                                                                                                                                                                                                                                                                                                        |
| cancer             | Testicular germ cell tumor                                                     | Testicular germ cell tumor                              | BAK1, UCK2, KITLG                                                                                                                                                                                                                                                                                                                                                                                                                                                                                                                                                   |
|                    | Thromboembolic disorder                                                        | Venous thromboembolism                                  | ABO                                                                                                                                                                                                                                                                                                                                                                                                                                                                                                                                                                 |
|                    | Thyroid stimulating hormone                                                    | Thyroid stimulating hormone                             | TMEM196, HACE1                                                                                                                                                                                                                                                                                                                                                                                                                                                                                                                                                      |
| metabolic syndrome | Type 2 diabetes and other traits                                               | Type 2 diabetes and other traits                        | SLC30A8, WFS1, CDKAL1, TCF7L2                                                                                                                                                                                                                                                                                                                                                                                                                                                                                                                                       |
|                    | Type B viral hepatitis                                                         | Hepatitis B                                             | HLA-DPB1                                                                                                                                                                                                                                                                                                                                                                                                                                                                                                                                                            |

**Supplementary Table 1. Manual Curation of textual terms representing complex traits and diseases in NHGRI GWAS Catalog.**

| <b>Metatrait</b>                  | <b>Complex Trait and Diseases (Curated Concept Used for Similarity Metric)</b> | <b>Complex Trait and Diseases (Original NHGRI Term)</b> | <b>Host Gene (dbSNP)</b>                                                                                                                       |
|-----------------------------------|--------------------------------------------------------------------------------|---------------------------------------------------------|------------------------------------------------------------------------------------------------------------------------------------------------|
|                                   | Ulcerative colitis                                                             | Ulcerative colitis                                      | CARD9, IL23R, NKX2-3, PUS10, RNF186, ZFP90, FCGR2A, SATB2, LAMB1, GSDMB, IL26, IL10, MST1, OTUD3, CIITA, IL17REL, C1orf106, CCHCR1, BTNL2, BSN |
|                                   | Vascular calcification                                                         | Coronary artery calcification                           | NUMB, UTP20                                                                                                                                    |
|                                   | Vitamin D levels                                                               | Vitamin D levels                                        | CYP2R1, GC, NADSYN1                                                                                                                            |
|                                   | Vitiligo                                                                       | Vitiligo                                                | UBASH3A, SMOC2, TYR, LPP, C1QTNF6, PTPN22, BTNL2, RERE, HCG9, IL2RA, GZMB                                                                      |
| risk factor of metabolic syndrome | Waist circumference                                                            | Waist circumference                                     | NRXN3, FTO, LOC100132788                                                                                                                       |
|                                   |                                                                                | Waist circumference and related phenotypes              | GCKR                                                                                                                                           |
|                                   | Warfarin maintenance dose                                                      | Warfarin maintenance dose                               | CYP2C9, STX4, CYP4F2, CACNA1C, VKORC1                                                                                                          |
| metabolic syndrome                | Weight                                                                         | Weight                                                  | BICD1, SEC16B, LPP, ADAMTS14, CCDC100, LOC100132353, BDNF, FTO, CCDC46, SH2B1, DUPD1                                                           |
|                                   | YKL-40 levels                                                                  | YKL-40 levels                                           | CHI3L1                                                                                                                                         |



**Supplementary Table 2: Enrichment of direct and indirect protein-protein interactions in gene-gene pairs with high information similarity on a genome scale and in the subset of host genes for complex traits in NHGRI GWAS Catalog**

| Genome-wide             | num of     |            |            | NHGRI-wide GO        |              |                      |                |
|-------------------------|------------|------------|------------|----------------------|--------------|----------------------|----------------|
| GO biological processes | 5753 genes |            |            | biological processes | num of genes |                      | 457            |
|                         | ITS>=0.7   | ITS<=0.7   | subtotal   | ITS>=0.7             | ITS<=0.7     | subtotal             |                |
| PPIN_8                  | 7,314      | 41,710     | 49,024     | PPIN_8               | 25           | 384                  | 409            |
| Not in PPIN             | 53,714     | 16,442,890 | 16,496,604 | Not in PPIN          | 285          | 103,502              | 103,787        |
| subtotal                | 61,028     | 16,484,600 | 16,545,628 | subtotal             | 310          | 103,886              | 104,196        |
| Odds ratio              | 53.68      | FET        | <2.2E-16   | Odds ratio           | 23.64        | FET                  | <2.2E-16       |
|                         | ITS>=0.8   | ITS<=0.8   | subtotal   | ITS>=0.8             | ITS<=0.8     | subtotal             |                |
| PPIN_8                  | 4,881      | 44,143     | 49,024     | PPIN_8               | 19           | 390                  | 409            |
| Not in PPIN             | 30,091     | 16,466,513 | 16,496,604 | Not in PPIN          | 138          | 103,649              | 103,787        |
| subtotal                | 34,972     | 16,510,656 | 16,545,628 | subtotal             | 157          | 104,039              | 104,196        |
| Odds ratio              | 60.51      | FET        | <2.2E-16   | Odds ratio           | 36.59        | FET                  | <2.2E-16       |
|                         | ITS>=0.9   | ITS<=0.9   | subtotal   | ITS>=0.9             | ITS<=0.9     | subtotal             |                |
| PPIN_8                  | 2,368      | 46,656     | 49,024     | PPIN_8               | 10           | 399                  | 409            |
| Not in PPIN             | 11,859     | 16,484,745 | 16,496,604 | Not in PPIN          | 49           | 103,738              | 103,787        |
| subtotal                | 14,227     | 16,531,401 | 16,545,628 | subtotal             | 59           | 104,137              | 104,196        |
| Odds ratio              | 70.55      | FET        | <2.2E-16   | Odds ratio           | 53.06        | FET                  | 4.12E-14       |
|                         | ITS>=0.7   | ITS<=0.7   | subtotal   | ITS>=0.7             | ITS<=0.7     | subtotal             |                |
| PPIN distance<=2        | 15,194     | 622,791    | 637,985    | PPIN distance<=2     | 73           | 5,379                | 5,452          |
| PPIN distance>2         | 45,834     | 15,861,809 | 15,907,643 | PPIN distance>2      | 237          | 98,507               | 98,744         |
| subtotal                | 61,028     | 16,484,600 | 16,545,628 | subtotal             | 310          | 103,886              | 104,196        |
| Odds ratio              | 8.44       | FET        | <2.2E-16   | Odds ratio           | 5.64         | FET                  | <2.2E-16       |
|                         | ITS>=0.8   | ITS<=0.8   | subtotal   | ITS>=0.8             | ITS<=0.8     | subtotal             |                |
| PPIN distance<=2        | 9,342      | 628,643    | 637,985    | PPIN distance<=2     | 40           | 5,412                | 5,452          |
| PPIN distance>2         | 25,630     | 15,882,013 | 15,907,643 | PPIN distance>2      | 117          | 98,627               | 98,744         |
| subtotal                | 34,972     | 16,510,656 | 16,545,628 | subtotal             | 157          | 104,039              | 104,196        |
| Odds ratio              | 9.21       | FET        | <2.2E-16   | Odds ratio           | 6.23         | FET                  | <2.2E-16       |
|                         | ITS>=0.9   | ITS<=0.9   | subtotal   | ITS>=0.9             | ITS<=0.9     | subtotal             |                |
| PPIN distance<=2        | 4,422      | 633,563    | 637,985    | PPIN distance<=2     | 14           | 5,438                | 5,452          |
| PPIN distance>2         | 9,805      | 15,897,838 | 15,907,643 | PPIN distance>2      | 45           | 98,699               | 98,744         |
| subtotal                | 14,227     | 16,531,401 | 16,545,628 | subtotal             | 59           | 104,137              | 104,196        |
| Odds ratio              | 11.32      | FET        | <2.2E-16   | Odds ratio           | 5.65         | FET                  | <b>1.6E-06</b> |
|                         |            |            |            |                      |              | minimal significance |                |

**Supplementary Table 2: Enrichment of direct and indirect protein-protein interactions in gene-gene pairs with high information similarity on a genome scale and in the subset of host genes for complex traits in NHGRI GWAS Catalog**

| genome-wide               |              |            |            | NHGRI-wide             |              |          |          |
|---------------------------|--------------|------------|------------|------------------------|--------------|----------|----------|
| GO molecular functions    | num of genes |            | 5955       | GO molecular functions | num of genes |          | 463      |
|                           | ITS>=0.7     | ITS<=0.7   | subtotal   |                        | ITS>=0.7     | ITS<=0.7 | subtotal |
| PPIN_8                    | 5,413        | 47,112     | 52,525     | PPIN_8                 | 45           | 383      | 428      |
| Not in PPIN               | 138,125      | 17,537,385 | 17,675,510 | Not in PPIN            | 485          | 106,040  | 106,525  |
| subtotal                  | 143,538      | 17,584,497 | 17,728,035 | subtotal               | 530          | 106,423  | 106,953  |
| Odds ratio                | 14.59 FET    |            | <2.2e-16   | Odds ratio             | 25.69 FET    |          | <2.2e-16 |
| <b>minimal odds ratio</b> |              |            |            |                        |              |          |          |
|                           | ITS>=0.8     | ITS<=0.8   | subtotal   |                        | ITS>=0.8     | ITS<=0.8 | subtotal |
| PPIN_8                    | 4,066        | 48,459     | 52,525     | PPIN_8                 | 32           | 396      | 428      |
| Not in PPIN               | 70,189       | 17,605,321 | 17,675,510 | Not in PPIN            | 206          | 106,319  | 106,525  |
| subtotal                  | 74,255       | 17,653,780 | 17,728,035 | subtotal               | 238          | 106,715  | 106,953  |
| Odds ratio                | 21.05 FET    |            | <2.2e-16   | Odds ratio             | 41.71 FET    |          | <2.2e-16 |
|                           | ITS>=0.9     | ITS<=0.9   | subtotal   |                        | ITS>=0.9     | ITS<=0.9 | subtotal |
| PPIN_8                    | 1,748        | 50,777     | 52,525     | PPIN_8                 | 10           | 418      | 428      |
| Not in PPIN               | 22,495       | 17,653,015 | 17,675,510 | Not in PPIN            | 45           | 106,480  | 106,525  |
| subtotal                  | 24,243       | 17,703,792 | 17,728,035 | subtotal               | 55           | 106,898  | 106,953  |
| Odds ratio                | 27.02 FET    |            | <2.2e-16   | Odds ratio             | 56.61 FET    |          | 2.36E-14 |
|                           | ITS>=0.7     | ITS<=0.7   | subtotal   |                        | ITS>=0.7     | ITS<=0.7 | subtotal |
| PPIN                      | 19,507       | 641,877    | 661,384    | PPIN                   | 197          | 5,438    | 5,635    |
| distance<=2               |              |            |            | distance<=2            |              |          |          |
| PPIN                      | 124,031      | 16,942,620 | 17,066,651 | PPIN                   | 333          | 100,985  | 101,318  |
| distance>2                |              |            |            | distance>2             |              |          |          |
| subtotal                  | 143,538      | 17,584,497 | 17,728,035 | subtotal               | 530          | 106,423  | 106,953  |
| Odds ratio                | 4.15 FET     |            | <2.2e-16   | Odds ratio             | 10.99 FET    |          | <2.2e-16 |
| <b>minimal odds ratio</b> |              |            |            |                        |              |          |          |
|                           | ITS>=0.8     | ITS<=0.8   | subtotal   |                        | ITS>=0.8     | ITS<=0.8 | subtotal |
| PPIN                      | 12,255       | 649,129    | 661,384    | PPIN                   | 111          | 5,524    | 5,635    |
| distance<=2               |              |            |            | distance<=2            |              |          |          |
| PPIN                      | 62,000       | 17,004,651 | 17,066,651 | PPIN                   | 127          | 101,191  | 101,318  |
| distance>2                |              |            |            | distance>2             |              |          |          |
| subtotal                  | 74,255       | 17,653,780 | 17,728,035 | subtotal               | 238          | 106,715  | 106,953  |
| Odds ratio                | 5.18 FET     |            | <2.2e-16   | Odds ratio             | 16.01 FET    |          | <2.2e-16 |
|                           | ITS>=0.9     | ITS<=0.9   | subtotal   |                        | ITS>=0.9     | ITS<=0.9 | subtotal |
| PPIN                      | 4,770        | 656,614    | 661,384    | PPIN                   | 32           | 5,603    | 5,635    |
| distance<=2               |              |            |            | distance<=2            |              |          |          |
| PPIN                      | 19,473       | 17,047,178 | 17,066,651 | PPIN                   | 23           | 101,295  | 101,318  |
| distance>2                |              |            |            | distance>2             |              |          |          |
| subtotal                  | 24,243       | 17,703,792 | 17,728,035 | subtotal               | 55           | 106,898  | 106,953  |
| Odds ratio                | 6.36 FET     |            | <2.2e-16   | Odds ratio             | 25.15 FET    |          | <2.2e-16 |

**Supplementary Table 3: Detailed information about 280 trait-trait similarity connections selected as significant ones among traits**

| trait1                                | trait2                           | number of hostgenes in trait1 | number of hostgene in trait2 | number of overlapping hostgenes | ITS of GO:BP | P-value of ITS |
|---------------------------------------|----------------------------------|-------------------------------|------------------------------|---------------------------------|--------------|----------------|
| Recombination rate (females)          | Recombination rate (males)       | 1                             | 1                            | 1                               | 1            | 0.0005         |
|                                       | Hemoglobin E/beta                |                               |                              |                                 |              |                |
| F-cell distribution                   | thalassemia disease              | 1                             | 1                            | 1                               | 1            | 0.0011         |
| Thromboembolic disorder               | YKL-40 levels                    | 1                             | 1                            | 0                               | 0.85         | 0.001          |
| Plasma level of vitamin B12           | Thromboembolic disorder          | 1                             | 1                            | 0                               | 0.8          | 0.0011         |
|                                       | risk factor rheumatoid           |                               |                              |                                 |              |                |
| Osteoarthritis of knee                | arthritis                        | 2                             | 1                            | 1                               | 0.67         | 0.0012         |
| Mass of body structure                | Weight                           | 9                             | 11                           | 6                               | 0.6          | 0              |
| Hemoglobin E/beta thalassemia disease | Kawasaki's disease               | 1                             | 2                            | 0                               | 0.59         | 0.0019         |
| F-cell distribution                   | Kawasaki's disease               | 1                             | 2                            | 0                               | 0.59         | 0.0013         |
| Acenocoumarol maintenance dosage      | Warfarin                         |                               |                              |                                 |              |                |
|                                       | maintenance dose                 | 2                             | 5                            | 1                               | 0.57         | 0              |
| Adenocarcinoma of lung                | Malignant tumor of lung          | 4                             | 8                            | 3                               | 0.5          | 0              |
| Soluble ICAM-1                        | Thromboembolic disorder          | 3                             | 1                            | 1                               | 0.5          | 0.0022         |
| Glioma                                | Idiopathic fibrosing alveolitis  | 3                             | 1                            | 1                               | 0.5          | 0.0016         |
| Malignant tumor of pancreas           | Thromboembolic disorder          | 3                             | 1                            | 1                               | 0.5          | 0.0019         |
| Neoplasm of testis                    | Testicular germ cell tumor       | 1                             | 3                            | 1                               | 0.5          | 0.0019         |
| risk factor of atherosclerosis-0      | risk factor of atherosclerosis-1 | 23                            | 31                           | 12                              | 0.49         | 0              |
| Sphingolipid concentrations           | Warfarin                         |                               |                              |                                 |              |                |
|                                       | maintenance dose                 | 2                             | 5                            | 0                               | 0.46         | 0.0003         |
| Primary biliary cirrhosis             | Systemic sclerosis               | 3                             | 2                            | 0                               | 0.45         | 0.0005         |
| Malignant tumor of esophagus          | Thromboembolic disorder          | 2                             | 1                            | 0                               | 0.45         | 0.0054         |
| Gallbladder calculus                  | Left ventricular mass            | 1                             | 1                            | 0                               | 0.45         | 0.0097         |
| Soluble ICAM-1                        | YKL-40 levels                    | 3                             | 1                            | 0                               | 0.43         | 0.0042         |
| Malignant tumor of pancreas           | YKL-40 levels                    | 3                             | 1                            | 0                               | 0.43         | 0.0045         |
| Injury of liver                       | Thromboembolic disorder          | 3                             | 1                            | 0                               | 0.43         | 0.0042         |
| risk factor of atherosclerosis-1      | risk of atherosclerosis          | 31                            | 19                           | 9                               | 0.42         | 0              |

**Supplementary Table 3: Detailed information about 280 trait-trait similarity connections selected as significant ones among traits**

| trait1                             | trait2                          | number of hostgenes in trait1 | number of hostgene in trait2 | number of overlapping hostgenes | ITS of GO:BP | P-value of ITS |
|------------------------------------|---------------------------------|-------------------------------|------------------------------|---------------------------------|--------------|----------------|
| Blood pressure finding             | risk of hypertension            | 15                            | 10                           | 5                               | 0.42         | 0              |
| Alcohol dependence                 | Panic disorder                  | 3                             | 6                            | 0                               | 0.42         | 0.0001         |
| Malignant tumor of nasopharynx     | Type B viral hepatitis          | 2                             | 1                            | 0                               | 0.41         | 0.0072         |
| Alcohol dependence                 | Systemic sclerosis              | 3                             | 2                            | 0                               | 0.40         | 0.0015         |
| Folate pathway vitamin levels      | Plasma level of vitamin B12     | 4                             | 1                            | 1                               | 0.4          | 0.0026         |
| Adenocarcinoma of lung             | Idiopathic fibrosing alveolitis | 4                             | 1                            | 1                               | 0.4          | 0.0019         |
| Juvenile idiopathic arthritis      | Primary biliary cirrhosis       | 2                             | 3                            | 1                               | 0.4          | 0.0049         |
| Drowsy                             | Neurosis                        | 2                             | 3                            | 1                               | 0.4          | 0.0055         |
| Soluble ICAM-1                     | Soluble levels of               |                               |                              |                                 |              |                |
|                                    | adhesion molecules              | 3                             | 2                            | 1                               | 0.4          | 0.0055         |
| Aortic root dilatation             | Glaucoma                        | 3                             | 2                            | 1                               | 0.4          | 0.0049         |
| Malignant tumor of pancreas        | Plasma level of vitamin B12     | 3                             | 1                            | 0                               | 0.4          | 0.0043         |
| Plasma level of vitamin B12        | YKL-40 levels                   | 1                             | 1                            | 0                               | 0.4          | 0.011          |
| Plasma level of vitamin B12        | Soluble ICAM-1                  | 1                             | 3                            | 0                               | 0.4          | 0.0047         |
| Malignant tumor of esophagus       | Plasma level of vitamin B12     | 2                             | 1                            | 0                               | 0.38         | 0.0091         |
| Hypertensive disorder              | risk of hypertension            | 4                             | 10                           | 2                               | 0.37         | 0.0001         |
| Acenocoumarol maintenance dosage   | Sphingolipid concentrations     | 2                             | 2                            | 0                               | 0.37         | 0.0076         |
| Fasting Glucose (Diabetes-related) | risk of diabetes mellitus       | 14                            | 5                            | 3                               | 0.36         | 0              |
| Kawasaki's disease                 | Systemic sclerosis              | 2                             | 2                            | 0                               | 0.36         | 0.01           |
|                                    | risk factor of diabetes         |                               |                              |                                 |              |                |
| Panic disorder                     | and of obesity                  | 6                             | 3                            | 0                               | 0.35         | 0.0008         |
| Neoplasm of testis                 | myeloproliferative disorder     | 1                             | 1                            | 0                               | 0.35         | 0.0138         |
| risk factor of atherosclerosis-0   | risk of atherosclerosis         | 23                            | 19                           | 7                               | 0.35         | 0              |
| Hypertensive disorder              | Serum matrix metalloproteinase  | 4                             | 1                            | 0                               | 0.35         | 0.0047         |
| Serum matrix metalloproteinase     | atherosclerosis                 | 1                             | 4                            | 0                               | 0.35         | 0.0043         |
| Thromboembolic disorder            | diabetes II or I                | 1                             | 4                            | 0                               | 0.34         | 0.0053         |
| YKL-40 levels                      | diabetes II or I                | 1                             | 4                            | 0                               | 0.34         | 0.0065         |

**Supplementary Table 3: Detailed information about 280 trait-trait similarity connections selected as significant ones among traits**

| trait1                                     | trait2                                | number of hostgenes in trait1 | number of hostgene in trait2 | number of overlapping hostgenes | ITS of GO:BP | P-value of ITS |
|--------------------------------------------|---------------------------------------|-------------------------------|------------------------------|---------------------------------|--------------|----------------|
| Biomedical quantitative traits             | Thyroid stimulating hormone           | 4                             | 2                            | 0                               | 0.33         | 0.0071         |
| Birth weight finding                       | risk of diabetes mellitus             | 1                             | 5                            | 1                               | 0.33         | 0.0023         |
| Coronary arteriosclerosis                  | risk factor of atherosclerosis-0.5    | 5                             | 1                            | 1                               | 0.33         | 0.0026         |
| Malignant tumor of pancreas                | Soluble ICAM-1                        | 3                             | 3                            | 1                               | 0.33         | 0.0081         |
| Basal cell carcinoma of skin               | Thyroid stimulating hormone           | 1                             | 2                            | 0                               | 0.33         | 0.0128         |
| Diabetes mellitus type 2                   | Type 2 diabetes and other traits      | 16                            | 4                            | 3                               | 0.33         | 0              |
| Alcohol dependence                         | Primary biliary cirrhosis             | 3                             | 3                            | 0                               | 0.32         | 0.0108         |
| Folate pathway vitamin levels              | Thromboembolic disorder               | 4                             | 1                            | 0                               | 0.32         | 0.0064         |
| Cerebrovascular accident                   | Hirschsprung's disease                | 2                             | 2                            | 0                               | 0.32         | 0.0154         |
| Cerebrovascular accident                   | heart function                        | 2                             | 4                            | 0                               | 0.32         | 0.0073         |
| Hearing loss                               | Serum iron concentration              | 2                             | 1                            | 0                               | 0.32         | 0.0149         |
| Acquired immune deficiency syndrome (AIDS) | Hemoglobin E/beta thalassemia disease | 5                             | 1                            | 0                               | 0.31         | 0.0026         |
| Acquired immune deficiency syndrome (AIDS) | F-cell distribution                   | 5                             | 1                            | 0                               | 0.31         | 0.0045         |
| Adenocarcinoma of lung                     | Malignant tumor of pancreas           | 4                             | 3                            | 1                               | 0.31         | 0.0048         |
| Menarche and menopause (age at onset)      | Menopause (age at onset)              | 5                             | 8                            | 2                               | 0.31         | 0.0011         |
| Inflammatory bowel disease                 | Leprosy                               | 7                             | 3                            | 1                               | 0.31         | 0.001          |
| Aging                                      | Warfarin maintenance dose             | 4                             | 5                            | 0                               | 0.30         | 0.004          |
| Amyotrophic lateral sclerosis              | brain structure                       | 14                            | 17                           | 0                               | 0.30         | 0.0001         |
| Serum matrix metalloproteinase             | diabetes II or I                      | 1                             | 4                            | 0                               | 0.30         | 0.0049         |
| Serum matrix metalloproteinase             | Type 2 diabetes and other traits      | 1                             | 4                            | 0                               | 0.30         | 0.0082         |
| Kawasaki's disease                         | Menarche (age at onset)               | 2                             | 2                            | 0                               | 0.30         | 0.0169         |
| Kawasaki's disease                         | Restless legs                         | 2                             | 4                            | 0                               | 0.30         | 0.0111         |
| Conduct disorder                           | Hearing loss                          | 6                             | 2                            | 0                               | 0.30         | 0.0032         |

**Supplementary Table 3: Detailed information about 280 trait-trait similarity connections selected as significant ones among traits**

| trait1                                                   | trait2                                                       | number of hostgenes in trait1 | number of hostgene in trait2 | number of overlapping hostgenes | ITS of GO:BP | P-value of ITS |
|----------------------------------------------------------|--------------------------------------------------------------|-------------------------------|------------------------------|---------------------------------|--------------|----------------|
| Kawasaki's disease                                       | Primary biliary cirrhosis                                    | 2                             | 3                            | 0                               | 0.30         | 0.014          |
| Alzheimer's disease                                      | C-reactive protein                                           | 9                             | 9                            | 2                               | 0.29         | 0.001          |
| Mass of body structure                                   | Waist circumference                                          | 9                             | 4                            | 1                               | 0.29         | 0.0009         |
| Hypertensive disorder                                    | Sphingolipid concentrations                                  | 4                             | 2                            | 0                               | 0.29         | 0.0131         |
| Menarche (age at onset)                                  | Menarche and menopause (age at onset)                        | 2                             | 5                            | 1                               | 0.29         | 0.0085         |
| Adenocarcinoma of lung                                   | Glioma                                                       | 4                             | 3                            | 1                               | 0.29         | 0.0118         |
| Atrial fibrillation                                      | Ischemic stroke risk factor of diabetes atherosclerosis      | 6                             | 1                            | 1                               | 0.29         | 0.003          |
| Other metabolic traits                                   | and of obesity diabetes II or I                              | 4                             | 3                            | 1                               | 0.29         | 0.0103         |
| Injury of liver                                          | Malignant tumor of pancreas                                  | 4                             | 4                            | 1                               | 0.29         | 0.0082         |
| Injury of liver                                          | Malignant tumor of pancreas                                  | 3                             | 3                            | 0                               | 0.28         | 0.017          |
| Hypertensive disorder                                    | Soluble ICAM-1                                               | 3                             | 3                            | 0                               | 0.28         | 0.0174         |
| Angiotensin-converting-enzyme inhibitor adverse reaction | Warfarin maintenance dose risk factor of atherosclerosis-0.5 | 4                             | 5                            | 0                               | 0.28         | 0.0068         |
| Serum matrix metalloproteinase                           | Warfarin maintenance dose                                    | 1                             | 1                            | 0                               | 0.28         | 0.0233         |
| Serum iron concentration                                 | Systemic sclerosis                                           | 1                             | 5                            | 0                               | 0.28         | 0.007          |
| cardiac function                                         | cardiovascular function                                      | 1                             | 2                            | 0                               | 0.28         | 0.0204         |
| Chronic leukemia                                         | cardiovascular function                                      | 23                            | 6                            | 4                               | 0.28         | 0              |
| Major depressive disorder                                | heart function                                               | 6                             | 4                            | 0                               | 0.28         | 0.0055         |
| Alzheimer's disease                                      | eye function                                                 | 11                            | 9                            | 1                               | 0.27         | 0.0015         |
| Coagulation factor VII (substance)                       | Major depressive disorder                                    | 9                             | 11                           | 0                               | 0.27         | 0.0014         |
| Malignant tumor of esophagus                             | Serum iron concentration                                     | 1                             | 1                            | 0                               | 0.27         | 0.025          |
| Malignant tumor of esophagus                             | Malignant tumor of pancreas                                  | 2                             | 3                            | 0                               | 0.27         | 0.0193         |
| Crohn's disease                                          | Soluble ICAM-1                                               | 2                             | 3                            | 0                               | 0.27         | 0.0189         |
| Atrial fibrillation                                      | Ulcerative colitis                                           | 17                            | 20                           | 4                               | 0.27         | 0.0006         |
| Neoplasm of testis                                       | cardiovascular function                                      | 6                             | 6                            | 0                               | 0.27         | 0.0048         |
|                                                          | Otosclerosis                                                 | 1                             | 1                            | 0                               | 0.27         | 0.0249         |

**Supplementary Table 3: Detailed information about 280 trait-trait similarity connections selected as significant ones among traits**

| trait1                                     | trait2                           | number of hostgenes in trait1 | number of hostgene in trait2 | number of overlapping hostgenes | ITS of GO:BP | P-value of ITS |
|--------------------------------------------|----------------------------------|-------------------------------|------------------------------|---------------------------------|--------------|----------------|
| Neoplasm of testis                         | Neuroblastoma                    | 1                             | 1                            | 0                               | 0.27         | 0.0273         |
| Acquired immune deficiency syndrome (AIDS) | Kawasaki's disease               | 5                             | 2                            | 0                               | 0.27         | 0.0115         |
| Malignant tumor of esophagus               | YKL-40 levels                    | 2                             | 1                            | 0                               | 0.27         | 0.0228         |
| Malignant tumor of esophagus               | Osteoporosis                     | 2                             | 1                            | 0                               | 0.27         | 0.0228         |
| Acenocoumarol maintenance dosage           | Osteoporosis                     | 2                             | 1                            | 0                               | 0.27         | 0.0204         |
| Glaucoma                                   | Osteoporosis                     | 2                             | 1                            | 0                               | 0.27         | 0.0217         |
| QT interval                                | cardiac function                 | 15                            | 23                           | 4                               | 0.27         | 0.0004         |
| Folate pathway vitamin levels              | Malignant tumor of pancreas      | 4                             | 3                            | 0                               | 0.26         | 0.0171         |
| Hearing loss                               | Primary biliary cirrhosis        | 2                             | 3                            | 0                               | 0.26         | 0.0192         |
| Kawasaki's disease                         | Response to diuretic therapy     | 2                             | 1                            | 0                               | 0.26         | 0.0214         |
| Serum bilirubin raised                     | Serum matrix metalloproteinase   | 4                             | 1                            | 0                               | 0.26         | 0.0138         |
| Hemoglobin E/beta thalassemia disease      | Systemic sclerosis               | 1                             | 2                            | 0                               | 0.26         | 0.0238         |
| F-cell distribution                        | Systemic sclerosis               | 1                             | 2                            | 0                               | 0.26         | 0.0245         |
| Crohn's disease                            | Inflammatory bowel disease       | 17                            | 7                            | 3                               | 0.26         | 0.0001         |
| Atrial fibrillation                        | Hypertensive disorder            | 6                             | 4                            | 0                               | 0.26         | 0.0082         |
| Fasting Glucose (Diabetes-related)         | diabetes II or I                 | 14                            | 4                            | 2                               | 0.26         | 0.0008         |
| Hearing loss                               | Select biomarker traits          | 2                             | 5                            | 0                               | 0.26         | 0.0166         |
| Drowsy                                     | Response to diuretic therapy     | 2                             | 1                            | 0                               | 0.26         | 0.0251         |
| Select biomarker traits                    | immune system                    | 5                             | 3                            | 1                               | 0.26         | 0.0109         |
| Atrial fibrillation                        | Coronary arteriosclerosis        | 6                             | 5                            | 0                               | 0.26         | 0.0085         |
| Birth weight finding                       | Response to citalopram treatment | 1                             | 2                            | 0                               | 0.26         | 0.0275         |
| Major depressive disorder                  | Response to statin therapy       | 11                            | 13                           | 0                               | 0.25         | 0.0029         |
| Crohn's disease                            | Leprosy                          | 17                            | 3                            | 2                               | 0.25         | 0              |
| Hypertensive disorder                      | Major depressive disorder        | 4                             | 11                           | 0                               | 0.25         | 0.0025         |
| Waist circumference                        | Weight                           | 4                             | 11                           | 1                               | 0.25         | 0.0025         |

**Supplementary Table 3: Detailed information about 280 trait-trait similarity connections selected as significant ones among traits**

| trait1                                     | trait2                                        | number of hostgenes in trait1 | number of hostgene in trait2 | number of overlapping hostgenes | ITS of GO:BP | P-value of ITS |
|--------------------------------------------|-----------------------------------------------|-------------------------------|------------------------------|---------------------------------|--------------|----------------|
| Kidney stone                               | Malignant tumor of nasopharynx                | 1                             | 2                            | 0                               | 0.25         | 0.0252         |
| Eosinophilic esophagitis                   | Serum creatinine abnormal                     | 6                             | 4                            | 1                               | 0.25         | 0.0104         |
| Atrial fibrillation                        | Hemoglobin E/beta                             |                               |                              |                                 |              |                |
| Atrial fibrillation                        | thalassemia disease                           | 6                             | 1                            | 0                               | 0.25         | 0.0064         |
| Atrial fibrillation                        | F-cell distribution                           | 6                             | 1                            | 0                               | 0.25         | 0.0063         |
| Malignant tumor of pancreas                | Response to diuretic therapy                  | 3                             | 1                            | 0                               | 0.25         | 0.0168         |
| Asthma                                     | immune system                                 | 5                             | 3                            | 1                               | 0.25         | 0.019          |
| Atrial fibrillation                        | Kawasaki's disease                            | 6                             | 2                            | 1                               | 0.25         | 0.0097         |
| Diabetic renal disease                     | Response to treatment for acute lymphoblastic |                               |                              |                                 |              |                |
| Acenocoumarol maintenance dosage           | leukemia                                      | 1                             | 7                            | 1                               | 0.25         | 0.0049         |
| Acenocoumarol maintenance dosage           | Malignant tumor of esophagus                  | 2                             | 2                            | 0                               | 0.25         | 0.0277         |
| Glaucoma                                   | Glaucoma                                      | 2                             | 2                            | 0                               | 0.25         | 0.0273         |
| Cerebrovascular accident                   | Malignant tumor of esophagus                  | 2                             | 2                            | 0                               | 0.25         | 0.028          |
| Biomedical quantitative traits             | Hearing loss                                  | 2                             | 2                            | 0                               | 0.25         | 0.0283         |
| Osteoarthritis                             | Waist circumference                           | 4                             | 4                            | 1                               | 0.25         | 0.0161         |
| Acquired immune deficiency syndrome (AIDS) | inflammation                                  | 1                             | 3                            | 0                               | 0.25         | 0.0192         |
| Type 2 diabetes and other traits           | Injury of liver                               | 5                             | 3                            | 1                               | 0.25         | 0.0157         |
| Alcohol dependence                         | diabetes II or I                              | 4                             | 4                            | 1                               | 0.25         | 0.0204         |
| Other metabolic traits                     | Ankylosing spondylitis                        | 3                             | 5                            | 1                               | 0.25         | 0.0173         |
| Folate pathway vitamin levels              | Waist circumference                           | 4                             | 4                            | 1                               | 0.25         | 0.0226         |
| Folate pathway vitamin levels              | Quantitative traits                           | 4                             | 15                           | 1                               | 0.25         | 0.0004         |
| Aging                                      | Warfarin maintenance dose                     | 4                             | 5                            | 0                               | 0.25         | 0.0124         |
| Panic disorder                             | Serum bilirubin raised                        | 4                             | 4                            | 0                               | 0.25         | 0.0213         |
| brain structure                            | Systemic sclerosis                            | 6                             | 2                            | 0                               | 0.25         | 0.0119         |
|                                            | eye function                                  | 17                            | 9                            | 0                               | 0.25         | 0.0022         |



**Supplementary Table 3: Detailed information about 280 trait-trait similarity connections selected as significant ones among traits**

| trait1                                     | trait2                                                 | number of hostgenes in trait1 | number of hostgene in trait2 | number of overlapping hostgenes | ITS of GO:BP | P-value of ITS |
|--------------------------------------------|--------------------------------------------------------|-------------------------------|------------------------------|---------------------------------|--------------|----------------|
| Malignant tumor of nasopharynx             | Soluble levels of adhesion molecules                   | 2                             | 2                            | 0                               | 0.25         | 0.0298         |
| Aging                                      | Lentigo                                                | 4                             | 2                            | 0                               | 0.25         | 0.0214         |
| Lentigo                                    | Primary tooth development (number of teeth)            | 2                             | 4                            | 0                               | 0.24         | 0.0212         |
| Soluble ICAM-1                             | diabetes II or I                                       | 3                             | 4                            | 0                               | 0.24         | 0.0229         |
| Malignant tumor of pancreas                | diabetes II or I                                       | 3                             | 4                            | 0                               | 0.24         | 0.0242         |
| Coronary arteriosclerosis                  | Serum matrix metalloproteinase                         | 5                             | 1                            | 0                               | 0.24         | 0.0089         |
| Schizophrenia                              | Systemic lupus erythematosus                           | 11                            | 20                           | 0                               | 0.24         | 0.0009         |
| Alcohol dependence                         | Response to treatment for acute lymphoblastic leukemia | 3                             | 7                            | 0                               | 0.24         | 0.0074         |
| Hearing loss                               | Hirschsprung's disease                                 | 2                             | 2                            | 0                               | 0.24         | 0.0287         |
| Kawasaki's disease                         | Response to TNF antagonist treatment                   | 2                             | 3                            | 0                               | 0.24         | 0.0232         |
| Alcohol dependence                         | Kawasaki's disease                                     | 3                             | 2                            | 0                               | 0.24         | 0.0309         |
| Chronic leukemia                           | Conduct disorder                                       | 6                             | 6                            | 0                               | 0.24         | 0.0138         |
| Acquired immune deficiency syndrome (AIDS) | Psoriasis                                              | 5                             | 8                            | 1                               | 0.24         | 0.0103         |
| Hearing loss                               | Serum bilirubin raised                                 | 2                             | 4                            | 0                               | 0.24         | 0.0212         |
| Acute lymphoid leukemia                    | Atrial fibrillation                                    | 10                            | 6                            | 0                               | 0.24         | 0.0062         |
| Serum bilirubin raised                     | Sphingolipid concentrations                            | 4                             | 2                            | 0                               | 0.23         | 0.0253         |
| C-reactive protein                         | brain structure                                        | 9                             | 17                           | 2                               | 0.23         | 0.0031         |
| Aging                                      | Mass of body structure                                 | 4                             | 9                            | 0                               | 0.23         | 0.0068         |
| C-reactive protein                         | Other metabolic traits                                 | 9                             | 4                            | 1                               | 0.23         | 0.0076         |
| Malignant tumor of pancreas                | Response to treatment for acute lymphoblastic leukemia | 3                             | 7                            | 0                               | 0.23         | 0.0103         |
| Celiac disease                             | Systemic lupus erythematosus                           | 23                            | 20                           | 2                               | 0.23         | 0.0034         |

**Supplementary Table 3: Detailed information about 280 trait-trait similarity connections selected as significant ones among traits**

| trait1                             | trait2                                      | number of hostgenes in trait1 | number of hostgene in trait2 | number of overlapping hostgenes | ITS of GO:BP | P-value of ITS |
|------------------------------------|---------------------------------------------|-------------------------------|------------------------------|---------------------------------|--------------|----------------|
| Neuroblastoma                      | myeloproliferative disorder                 | 1                             | 1                            | 0                               | 0.23         | 0.0319         |
| Chronic leukemia                   | Primary tooth development (number of teeth) | 6                             | 4                            | 0                               | 0.23         | 0.0146         |
| Hirschsprung's disease             | Restless legs                               | 2                             | 4                            | 0                               | 0.23         | 0.0233         |
| Blood pressure finding             | Hypertensive disorder                       | 15                            | 4                            | 2                               | 0.23         | 0.0008         |
| Psoriasis                          | Systemic lupus erythematosus                | 8                             | 20                           | 1                               | 0.23         | 0.0013         |
| Serum matrix metalloproteinase     | cardiovascular function                     | 1                             | 6                            | 0                               | 0.23         | 0.009          |
| Conduct disorder                   | Serum metabolites                           | 6                             | 9                            | 1                               | 0.23         | 0.0099         |
| C-reactive protein                 | Fasting Glucose (Diabetes-related)          | 9                             | 14                           | 1                               | 0.23         | 0.0065         |
| Coagulation factor VII (substance) | Diabetic renal disease                      | 1                             | 1                            | 0                               | 0.23         | 0.0318         |
| Quantitative traits                | cardiovascular function                     | 15                            | 6                            | 0                               | 0.23         | 0.0029         |
| Folate pathway vitamin levels      | Soluble ICAM-1                              | 4                             | 3                            | 0                               | 0.23         | 0.0314         |
| Aging                              | Serum matrix metalloproteinase              | 4                             | 1                            | 0                               | 0.23         | 0.0149         |
| Aging                              | Lesion of brain risk factor of diabetes     | 4                             | 2                            | 0                               | 0.23         | 0.0242         |
| Birth weight finding               | and of obesity risk factor of               | 1                             | 3                            | 0                               | 0.23         | 0.0234         |
| C-reactive protein                 | atherosclerosis-0                           | 9                             | 23                           | 3                               | 0.23         | 0.0017         |
| Exercise (leisure time)            | Serum iron concentration                    | 1                             | 1                            | 0                               | 0.23         | 0.0323         |
| Response to statin therapy         | Sphingolipid concentrations                 | 13                            | 2                            | 0                               | 0.23         | 0.0004         |
| Malignant tumor of pancreas        | liver function                              | 3                             | 8                            | 1                               | 0.23         | 0.0097         |
| Major depressive disorder          | Panic disorder                              | 11                            | 6                            | 1                               | 0.23         | 0.0078         |
| HIV                                | Psoriasis                                   | 20                            | 8                            | 1                               | 0.23         | 0.0025         |
| Major depressive disorder          | risk of hypertension                        | 11                            | 10                           | 0                               | 0.23         | 0.0108         |
| Coronary arteriosclerosis          | Serum bilirubin raised                      | 5                             | 4                            | 0                               | 0.22         | 0.0205         |
| Kawasaki's disease                 | cardiovascular function                     | 2                             | 6                            | 0                               | 0.22         | 0.0164         |
| Fasting Glucose (Diabetes-related) | risk of gout                                | 14                            | 10                           | 1                               | 0.22         | 0.0113         |

**Supplementary Table 3: Detailed information about 280 trait-trait similarity connections selected as significant ones among traits**

| trait1                                                                                      | trait2                                | number of<br>hostgenes<br>in trait1 | number of<br>hostgene in<br>trait2 | number of<br>overlapping<br>hostgenes | ITS of<br>GO:BP | P-value<br>of ITS |
|---------------------------------------------------------------------------------------------|---------------------------------------|-------------------------------------|------------------------------------|---------------------------------------|-----------------|-------------------|
| Chronic renal impairment                                                                    | Serum creatinine abnormal             | 17                                  | 4                                  | 2                                     | 0.22            | 0.0011            |
| Response to statin therapy                                                                  | eye function                          | 13                                  | 9                                  | 1                                     | 0.22            | 0.0112            |
| Cerebrovascular accident                                                                    | Chronic leukemia                      | 2                                   | 6                                  | 0                                     | 0.22            | 0.0165            |
| Disorder of coronary artery<br>Response to treatment<br>for acute lymphoblastic<br>leukemia | Myocardial infarction                 | 7                                   | 5                                  | 1                                     | 0.22            | 0.0168            |
| Aging                                                                                       | Systemic sclerosis                    | 7                                   | 2                                  | 0                                     | 0.22            | 0.0069            |
| Hirschsprung's disease                                                                      | eye function                          | 4                                   | 9                                  | 0                                     | 0.22            | 0.0101            |
| Waist circumference                                                                         | heart function                        | 2                                   | 4                                  | 0                                     | 0.22            | 0.0283            |
| Type 2 diabetes and<br>other traits                                                         | risk of diabetes<br>mellitus          | 4                                   | 5                                  | 1                                     | 0.22            | 0.0288            |
| Fasting Glucose<br>(Diabetes-related)                                                       | risk of diabetes<br>mellitus          | 4                                   | 5                                  | 1                                     | 0.22            | 0.0279            |
| Fasting Glucose<br>(Diabetes-related)                                                       | Type 2 diabetes and<br>other traits   | 14                                  | 4                                  | 2                                     | 0.22            | 0.0029            |
| Serum iron<br>concentration                                                                 | Other metabolic traits                | 14                                  | 4                                  | 2                                     | 0.22            | 0.0026            |
| Other metabolic traits                                                                      | risk factor of<br>atherosclerosis-0.5 | 1                                   | 1                                  | 0                                     | 0.22            | 0.0347            |
| Thromboembolic<br>disorder                                                                  | risk of diabetes<br>mellitus          | 4                                   | 5                                  | 1                                     | 0.22            | 0.0276            |
| Acute lymphoid leukemia                                                                     | liver function                        | 1                                   | 8                                  | 1                                     | 0.22            | 0.0065            |
| Osteoporosis                                                                                | cardiovascular<br>function            | 10                                  | 6                                  | 0                                     | 0.22            | 0.0126            |
| Acenocoumarol<br>maintenance dosage                                                         | Sphingolipid<br>concentrations        | 1                                   | 2                                  | 0                                     | 0.22            | 0.036             |
| Blood pressure finding                                                                      | Chronic leukemia                      | 2                                   | 6                                  | 0                                     | 0.22            | 0.0184            |
| Injury of liver                                                                             | Major depressive<br>disorder          | 15                                  | 11                                 | 0                                     | 0.22            | 0.0106            |
| Alzheimer's disease                                                                         | Psoriasis                             | 3                                   | 8                                  | 1                                     | 0.22            | 0.0099            |
| Hemoglobin E/beta<br>thalassemia disease                                                    | Amyotrophic lateral<br>sclerosis      | 9                                   | 14                                 | 1                                     | 0.22            | 0.0087            |
| F-cell distribution                                                                         | Menarche (age at<br>onset)            | 1                                   | 2                                  | 0                                     | 0.22            | 0.036             |
| Menarche (age at onset)                                                                     | Menarche (age at<br>onset)            | 1                                   | 2                                  | 0                                     | 0.22            | 0.0377            |
| Restless legs                                                                               | Primary biliary<br>cirrhosis          | 2                                   | 3                                  | 0                                     | 0.22            | 0.0325            |
|                                                                                             | Schizophrenia                         | 4                                   | 11                                 | 0                                     | 0.22            | 0.0062            |

**Supplementary Table 3: Detailed information about 280 trait-trait similarity connections selected as significant ones among traits**

| trait1                                     | trait2                                 | number of hostgenes in trait1 | number of hostgene in trait2 | number of overlapping hostgenes | ITS of GO:BP | P-value of ITS |
|--------------------------------------------|----------------------------------------|-------------------------------|------------------------------|---------------------------------|--------------|----------------|
| Malignant tumor of esophagus               | liver function                         | 2                             | 8                            | 0                               | 0.22         | 0.0074         |
| Acute lymphoid leukemia                    | Response to statin therapy             | 10                            | 13                           | 0                               | 0.22         | 0.0135         |
| Cerebrovascular accident                   | Systemic sclerosis                     | 2                             | 2                            | 0                               | 0.21         | 0.039          |
| Hearing loss                               | Systemic sclerosis                     | 2                             | 2                            | 0                               | 0.21         | 0.0356         |
| Celiac disease                             | Diabetes mellitus type 1               | 23                            | 40                           | 4                               | 0.21         | 0.004          |
| Aging                                      | inflammation                           | 4                             | 3                            | 0                               | 0.21         | 0.0343         |
| Malignant tumor of nasopharynx             | risk factor of diabetes and of obesity | 2                             | 3                            | 0                               | 0.21         | 0.0356         |
| Diabetic renal disease                     | nevi (skin)                            | 1                             | 1                            | 0                               | 0.21         | 0.0337         |
| Lentigo                                    | Vitiligo                               | 2                             | 11                           | 1                               | 0.21         | 0.0021         |
| Acquired immune deficiency syndrome (AIDS) | Systemic sclerosis                     | 5                             | 2                            | 0                               | 0.21         | 0.0243         |
| Panic disorder                             | Primary biliary cirrhosis              | 6                             | 3                            | 0                               | 0.21         | 0.0246         |
| Biochemical measures                       | Response to statin therapy             | 8                             | 13                           | 0                               | 0.21         | 0.013          |
| Cerebrovascular accident                   | Restless legs                          | 2                             | 4                            | 0                               | 0.21         | 0.0292         |
| Aging                                      | atherosclerosis                        | 4                             | 4                            | 0                               | 0.21         | 0.0337         |
| Hemoglobin E/beta thalassemia disease      | Response to diuretic therapy           | 1                             | 1                            | 0                               | 0.21         | 0.0361         |
| F-cell distribution                        | Response to diuretic therapy           | 1                             | 1                            | 0                               | 0.21         | 0.0328         |
| Response to statin therapy                 | cardiovascular function                | 13                            | 6                            | 0                               | 0.21         | 0.0096         |
| Atrial fibrillation                        | risk of hypertension                   | 6                             | 10                           | 1                               | 0.21         | 0.0168         |
| Major depressive disorder                  | cardiovascular function                | 11                            | 6                            | 0                               | 0.21         | 0.0153         |
| Serum markers of iron status               | risk of gout                           | 11                            | 10                           | 2                               | 0.21         | 0.0166         |
| C-reactive protein                         | Coronary arteriosclerosis              | 9                             | 5                            | 1                               | 0.21         | 0.0168         |
| Fasting Glucose (Diabetes-related)         | Major depressive disorder              | 14                            | 11                           | 0                               | 0.21         | 0.0132         |
| Alzheimer's disease                        | Select biomarker traits                | 9                             | 5                            | 0                               | 0.21         | 0.0174         |
| Mass of body structure                     | eye function                           | 9                             | 9                            | 0                               | 0.21         | 0.0206         |
| Atrial fibrillation                        | Serum creatinine abnormal              | 6                             | 4                            | 0                               | 0.21         | 0.0282         |

**Supplementary Table 3: Detailed information about 280 trait-trait similarity connections selected as significant ones among traits**

| trait1                                      | trait2                                                 | number of hostgenes in trait1 | number of hostgene in trait2 | number of overlapping hostgenes | ITS of GO:BP | P-value of ITS |
|---------------------------------------------|--------------------------------------------------------|-------------------------------|------------------------------|---------------------------------|--------------|----------------|
| cardiovascular function                     | eye function                                           | 6                             | 9                            | 0                               | 0.21         | 0.02           |
| Acquired immune deficiency syndrome (AIDS)  | Restless legs                                          | 5                             | 4                            | 0                               | 0.21         | 0.0346         |
| Chronic leukemia                            | Hearing loss                                           | 6                             | 2                            | 0                               | 0.21         | 0.0265         |
| Weight                                      | eye function                                           | 11                            | 9                            | 0                               | 0.21         | 0.0195         |
| Biochemical measures                        | risk of gout                                           | 8                             | 10                           | 1                               | 0.21         | 0.0246         |
| Otosclerosis                                | myeloproliferative disorder                            | 1                             | 1                            | 0                               | 0.21         | 0.0372         |
| Serum metabolites                           | integument color                                       | 9                             | 18                           | 1                               | 0.21         | 0.0102         |
| Primary tooth development (number of teeth) | immune system                                          | 4                             | 3                            | 0                               | 0.21         | 0.0372         |
| Panic disorder                              | Psoriasis                                              | 6                             | 8                            | 0                               | 0.21         | 0.0232         |
| Kawasaki's disease                          | Malignant tumor of pancreas                            | 2                             | 3                            | 0                               | 0.21         | 0.0347         |
| Amyotrophic lateral sclerosis               | eye function                                           | 14                            | 9                            | 0                               | 0.21         | 0.0171         |
| Alcohol dependence                          | cardiovascular function                                | 3                             | 6                            | 0                               | 0.21         | 0.0299         |
| C-reactive protein                          | risk of gout                                           | 9                             | 10                           | 1                               | 0.20         | 0.026          |
| Primary biliary cirrhosis                   | Response to treatment for acute lymphoblastic leukemia | 3                             | 7                            | 0                               | 0.20         | 0.018          |
| Thyroid stimulating hormone                 | risk factor of atherosclerosis-0.5                     | 2                             | 1                            | 0                               | 0.20         | 0.0399         |
| Alzheimer's disease                         | brain structure                                        | 9                             | 17                           | 1                               | 0.20         | 0.0112         |
| C-reactive protein                          | Quantitative traits                                    | 9                             | 15                           | 1                               | 0.20         | 0.0167         |
| Ageing                                      | risk of gout                                           | 4                             | 10                           | 0                               | 0.20         | 0.0142         |
| Finding of bilirubin level                  | YKL-40 levels                                          | 2                             | 1                            | 0                               | 0.20         | 0.0375         |
| Major depressive disorder                   | atherosclerosis                                        | 11                            | 4                            | 0                               | 0.20         | 0.0114         |
| nevi (skin)                                 | risk factor of atherosclerosis-0.5                     | 1                             | 1                            | 0                               | 0.20         | 0.0366         |
| Lentigo                                     | Soluble leptin receptor levels                         | 2                             | 1                            | 0                               | 0.20         | 0.0388         |
| Kawasaki's disease                          | Menarche and menopause (age at onset)                  | 2                             | 5                            | 0                               | 0.20         | 0.0302         |
| Acquired immune deficiency syndrome (AIDS)  | Response to statin therapy                             | 5                             | 13                           | 1                               | 0.20         | 0.012          |

**Supplementary Table 3: Detailed information about 280 trait-trait similarity connections selected as significant ones among traits**

| trait1                                | trait2                         | number of hostgenes in trait1 | number of hostgene in trait2 | number of overlapping hostgenes | ITS of GO:BP | P-value of ITS |
|---------------------------------------|--------------------------------|-------------------------------|------------------------------|---------------------------------|--------------|----------------|
| Chronic leukemia                      | Hirschsprung's disease         | 6                             | 2                            | 0                               | 0.20         | 0.0262         |
| Acenocoumarol maintenance dosage      | Aortic root dilatation         | 2                             | 3                            | 0                               | 0.2          | 0.0427         |
| Restless legs                         | cardiovascular function        | 4                             | 6                            | 1                               | 0.2          | 0.0366         |
| Hemoglobin E/beta thalassemia disease | Primary biliary cirrhosis      | 1                             | 3                            | 0                               | 0.2          | 0.0347         |
| Lentigo                               | integument color               | 2                             | 18                           | 2                               | 0.2          | 0.0001         |
| Cerebrovascular accident              | Lesion of brain                | 2                             | 2                            | 0                               | 0.2          | 0.0478         |
| C-reactive protein                    | Soluble leptin receptor levels | 9                             | 1                            | 1                               | 0.2          | 0.0049         |
| Aortic root dilatation                | Malignant tumor of esophagus   | 3                             | 2                            | 0                               | 0.2          | 0.0435         |
| Aortic root dilatation                | Osteoporosis                   | 3                             | 1                            | 0                               | 0.2          | 0.0325         |
| Malignant neoplastic disease          | nevi (skin)                    | 9                             | 1                            | 1                               | 0.2          | 0.0049         |
| Alcohol dependence                    | Cerebrovascular accident       | 3                             | 2                            | 0                               | 0.2          | 0.0411         |
| Alcohol dependence                    | Hearing loss                   | 3                             | 2                            | 0                               | 0.2          | 0.0398         |
| Response to citalopram treatment      | Systemic sclerosis             | 2                             | 2                            | 0                               | 0.2          | 0.0493         |
| Hearing loss                          | Lesion of brain                | 2                             | 2                            | 0                               | 0.2          | 0.0468         |
| Injury of liver                       | Plasma level of vitamin B12    | 3                             | 1                            | 0                               | 0.2          | 0.0328         |
| Basal cell carcinoma of skin          | Biomedical quantitative traits | 1                             | 4                            | 0                               | 0.2          | 0.0268         |
| F-cell distribution                   | Primary biliary cirrhosis      | 1                             | 3                            | 0                               | 0.2          | 0.0348         |
| Ageing                                | Osteoarthritis                 | 4                             | 1                            | 0                               | 0.2          | 0.0254         |
